# Supplementary material for: Telophase correction refines division orientation in stratified epithelia
Source: eLife. 2019 Dec 13;8:e49249. doi: 10.7554/eLife.49249 (PMC6959978; doi:10.7554/eLife.49249)
Supplement: Figure 1—source data 1. [file elife-49249-fig1-data1.xlsx]

## Sheet: Panel B,C
Anaphase	Telophase	Metaphase
21.793	62.97	21.208
3.417	7.047	27.016
76.886	70.525	77.241
41.779	6.316	88.231
39.631	72.779	32.404
40.517	56.657	22.807
36.864	4.238	48.106
39.03	77.005	1.745
45.499	12.057	13.694
56.927	4.905	73.515
77.342	87.695	60.015
84.912	88.788	76.119
5.699	85.54	54.174
8.294	65.964	87.577
44.287	5.04	46.712
38.972	82.991	0.801
57.764	70.333	34.858
86.849	84.973	82.199
69.474	85.89	13.354
75.104	77.206	86.794
7.535	4.807	70.224
83.433	76.003	82.641
80.206	9.696	87.711
39.93	88.109	44.307
62.902	76.757	7.513
2.634	10.988	5.561
51.171	86.839	16.279
63.172	2.249	45.301
9.439	68.607	88.763
28.614	74.012	39.58
35.896	83.111	29.277
49.869	84.925	89.087
89.11	82.869	79.104
17.294	81.489	39.107
35.411	3.069	41.106
44.312	26.094	66.424
69.795	38.339	69.012
29.448	86.248	39.012
16.043	83.443	63.119
58.736	15.291	72.115
47.51	4.135	71.377
80.933	86.937	50.916
9.132	89.588	76.799
82.566	85.324	72.93
14.465	78.483	38.733
84.102	15.416	5.178
48.564		9.67
8.114	6.791	10.456
8.196	77.108	25.824
39.642	5.251	6.369
51.217	78.902	17.028
7.679	6.529	14.903
79.983	81.998	28.01
70.195	47.043	7.619
76.913	76.411	56.3
13.343	87.168	45.034
65.117	20.396	52.853
56.891	18.769	67.689
88.855	69.622	9.228
88.673	77.335	86.403
71.192	89.689	73.249
66.154	67.94	3.351
80.199	43.196	31.318
51.854	87.74	74.589
84.832	19.12	47.871
39.308	88.234	89.459
52.576	89.756	81.844
68.491	18.22	86.875
85.943	9.036	10.307
16.617	5.286	9.462
	13.533	40.018
	19.563	89.032
	87.368	11.393
	17.12	87.501
	75.195	2.837
	89.404	29.349
	5.917	70.024
	89.508	32.564
	35.593
	7.735
	89.249
	27.046
	88.782
	84.49
	62.247
	47.574
	8.987
	83.982
	88.894
	68.878
	4.335
	81.181
	85.998
	87.09
	13.403
	5.534
	54.84
	3.316
	88.87
	77.747
	87.331
	5.106
	0.954
	89.523
	10.82
	75.182
	77.297
	84.854
	25.179
	77.664
	57.129
	79.221
	84.708
	80.196
	72.916
	6.988
	20.696
	66.305
	60.458
	83.34
	83.015
	71.49
	12.276
	77.873
	75.36
	68.651
	1.627
	87.377
	65.731
	7.326
	79.109
	3.81
	85.135
	81.625
	3.406
	11.786
	84.331
	85.85
	27.061
	16.202
	86.376
	74.869
	5.891
	86.463
	4.683
	73.241
	12.326
	80.3948
	86.2377
	86.3544
	2.574
	30.938
	8.812
	82.8302
	9.577
	54.8578
	0.958215
	1.79614
	83.7166
	21.0749
	87.6375
	2.30338
	87.1324
	77.0054
	79.662
	6.676
	1.13929
	89.604
	81.1671
	0.156915
	49.7484
	72.335
	3.31068
	6.00377
	4.64654
	81.7179
	85.5169
	87.7794
	10.391
	84.2721
	88.6789
	89.7753
	81.2431
	86.2633
	74.1481
	80.5471
	70.949
	9.79015
	80.4424
	68.417
	88.5072
	58.3925
	76.99
	81.5473
	3.284
	74.3741
	2.15837
	84.1747
	6.17566
	0.787221
	78.3816
	13.3925
	74.146
	75.4883
	77.617
	70.4377
	3.87006
	88.0642
	81.1826
	78.737
	0.243228
	55.838
	27.9798
	84.9204
	73.1888
	73.644
	76.663
	83.5155
	44.6808
	32.464
	5.57953
	80.2681
	18.352
	3.91894
	56.974
	30.7623
	1.82426
	83.258
	7.11139
	3.30033
	80.7529
	62.533
	88.1718
	64.5738
	85.1164
	88.9932
	10.8082
	16.476
	83.9205
	1.63734
	55.21
	75.07
	80.24
	86.65
	63.59
	80.75
	4.41
	5.26
	1.58
	72.87
	78.37
	2.38
	70.93
	78.64
	3.22
	69.78
	83.8
	77.55
	10.69
	82.98
	3.24
	89.3
	45.97
	87.24
	8.78
	85.76
	8.79
	17.51
	5.35
	87.79
	84.03
	11
	8.55246
	3.53911
	88.9093
	2.82892
	3.07137
	6.20406
	4.954
	8.01993
	1.234
	87.4893
	10.183
	86.019
	6.57904
	81.94
	13.91
	87.56
	88.54
	5.91
	85.21
	3.62
	87.92
	85.82
	17.23
	0.89
	74.26
	89
	8.71
	76.08
	82.2
	81.14
	74.5
	84.59
	53.1
	83.42
	8.27
	80.01
	0.26
	25.11
	5.23
	84.07
	82.11
	86.04
	66.51
	37.02
	12.8
	72.55
	26.35
	6.63
	5.25
	47.65
	2.79
	83.88
	88.67
	6.02
	71.91
	87.32
	11.96
	58.67
	64.32
	4.71
	84.27
	81.9
	88.25
	73.49
	3.23
	6.68
	88.82
	87.55
	77.71
	8.86
	81.09
	85.96
	85.51
	4.18
	89.53
	23.47
	88.97
	3.47
	3.63
	7.97
	62.16
	2
	34
	2.83
	70.85
	12.81
	69.72
	9.01
	20.41
	54.81
	89.46
	8.01
	78.88
	77.61
	88.98
	83.73
	2.91
	85.03
	86.2
	4.25
	8.14
	88.42
	85.14
	9.32
	70
	86.51
	88.86
	67.97
	81.48
	19.87
	78.28
	2.95
	14.54
	89.84
	84.54
	9.33
	84.99
	5.48

## Sheet: Panel F
ROSA26(mT/mG); K14-Cre
Time	Cell 1	Cell 2	Cell 3	Cell 4	Cell 5	Cell 6	Cell 7	Cell 8	Cell 9	Cell 10	Cell 11	Cell 12	Cell 13	Cell 14	Cell 15
0	13.1	9.3	2.4	21.6	25.8	32	40.62	49.6	52.7	68.9	64.3	58.5	75.4	73.6	86.1
5	4	7	10	23	28	34	35	44	57	60	64	68	74	76	83
10	3	10	5	28	32	26	28	38	62	75	60	70	82	82	80
15	7	10	3	18	28	31	29	20	64	72	66	73	81	83	85
20	1	8	4	18	27	16	22	17	59	75	72	77	84	83	84
25	1	5	3	6	16	24	27	15	73	76	71	72	81	80	85
30	4	6	2	10	13	22	16	15	70	84	73	72	82	80	87
35	3	6	4	9	12	16	14	11	82	86	72	79	79	83	90
40	3	8	3	9	16	16	15	8	79	89	73	76	81	86	83
45	2	4	4	12	12	6	10	15	75	90	74	83	86	87	81
50	2	12	0	12	13	5	16	15	81	89	81	78	86	80	79
55	3	6	4	14	8	10	10	11	79	88	75	83	83	88	86
60	9.4	5.6	2.2	16.6	3.366	14.5	17.1	12.7	81.8	86.8	76.4	82.5	80.3	84.9	86.6
ROSA26(mT/mG); K14-H2B-GFP
Time	Cell 1	Cell 2	Cell 3	Cell 4	Cell 5	Cell 6	Cell 7	Cell 8	Cell 9	Cell 10	Cell 11	Cell 12	Cell 13	Cell 14	Cell 15
0	3.726	5.649	7.857	19.03	23.34	29.94	33.68	43.02	44.32	55.15	60.62	65.92	73.2	79.99	86.73	87.74
5	2.965	2.995	1.204	16.01	20.82	23.54	30.89	37.53	22.3	59.64	62.29	70.45	71.48	81.47	80.05	88.68
10	2.643	0.683	0.541	11.42	20.78	21.09	20.23	21.52	22.02	60.19	66.67	75.91	78.18	81.87	79.05	87.83
15	5.005	0.771	4.297	2.696	17.51	14.54	13.37	15.19	19.79	68.19	70.35	81.83	75.89	80.54	79.37	82.91
20	3.126	1.219	3.683	3.701	15.91	11.77	10.25	7.116	14.76	69.64	77.28	76.39	76.97	83.37	77.65	79.54
25	4.161	0.681	3.233	1.238	13.7	9.416	7.705	3.489	14.53	72.98	73.5	77.07	83.53	80.75	77.68	80.66
30	4.36	2.35	2.62	2.529	10.64	7.89	4.97	1.606	10.71	70.03	76.13	88.32	85.3	79.22	76.55	78.27
35	2.278	1.276	2.75	3.766	10.71	7.101	8.381	4.019	10.82	71.8	72.65	85.59	85.49	83.31	73.74	78.27
40	1.402	2.564	1.848	3.751	11.74	10.99	5.194	2.492	15.22	79.83	73.3	84.22	79.75	85.33	79.55	77.47
45	1.91	1.316	2.802	2.82	12.71	4.922	5.276	2.551	11.52	72.9	74.6	87.59	84.29	84.84	77.89	76.68
50	3.738	2.286	1.26	1.124	10.31	8.73	5.102	2.73	12.35	75.4	78.69	84.59	86.03	83.2	79	80.55
55	0.693	0.754	3.4	1.548	12.05	11.89	6.973	2.451	9.994	79.24	80.84	81.25	86.06	81.66	81.87	81.44
60	0.864	2.592	5.548	3.999	7.696	8.206	4.97	1.497	9.762	80.6	77.09	84.62	88.21	85.12	83.1	82.58

## Sheet: Panel G,H
All WT E16.5 (T0)	All WT E16.5 (T60)
2.4	2.2
2.4	8.1
3.4	1.9
4.2	0.8
4.5	4.6
6.2	8.2
6.2	4.7
9.3	5.6
9.8	3.7
9.9	4.3
11.6	7.8
12.5	1.1
13.1	9.4
14.2	2.6
16	10.1
21.6	16.6
22.2	8.3
24.8	2
24.9	12.3
24.9	10.3
25.8	3.4
27.8	21.7
30.5	9.6
31	13.9
32	14.5
32.3	9.7
33	7.3
33.6	9.1
34.7	5.4
38.7	15.7
40.391	8.973
40.5	74.2
40.62	17.1
41.514	6.36
42.5	22.1
42.5	27.7
42.8	15.3
43	28.4
45	14.3
47.2	13.5
48.7	39.8
49.6	12.7
50.6	76.8
51.1	71.5
51.7	15.7
51.8	2.9
52.3	33.2
52.3	4.8
52.7	81.8
53.6	78.9
55.2	68.8
55.3	70.9
55.6	13.1
56.3	76.6
56.7	73
58.5	82.5
58.7	80.6
58.7	13.4
59.7	78.8
60.5	74.3
61.8	74.6
62.8	78.8
63.4	78.7
64.3	76.4
65.8	82.9
66.7	73.6
67.2	74.8
67.4	75.1
68.1	88.2
68.9	86.8
71	73.4
71.1	74.3
71.6	81.1
73.1	80.1
73.1	74.3
73.6	84.9
73.8	72.9
75.4	80.3
75.9	86.7
83	89
83.1	83.7
83.2	88
84.4	84
84.6	83.3
85.8	89.6
86.1	86.6
86.5	89
87.7	87.7
88.6	88.2
88.9	89.3
89.3	89.1
89.6	85.5
