# Supplementary material for: Telophase correction refines division orientation in stratified epithelia
Source: eLife. 2019 Dec 13;8:e49249. doi: 10.7554/eLife.49249 (PMC6959978; doi:10.7554/eLife.49249)
Supplement: Figure 2—source data 1. [file elife-49249-fig2-data1.xlsx]

## Sheet: Panel C
Scramble RFP (+) T0	Scramble RFP (+) T60
8.1	10.9
10.1	3.1
10.6	3.9
11.4	0.7
11.7	11.9
15.5	5.8
16.3	6.1
16.6	5.9
19.1	8.1
19.8	4.5
24.1	18.9
24.6	5.6
27.6	9
31.2	2.9
32.2	12.5
37.5	5.7
38.9	10.3
39.8	78.6
40	19.1
41.6	13
43.1	16.6
45	8.4
45.7	22.4
47.9	15.3
49	55
49.1	26.4
58.9	16.3
59.66	24.6
64.3	81.5
67.4	79
70	81.5
70.3	89.558
75.3	79.03
77.6	87.5
77.8	79.3
79.6	85.1
81.4	79.6
83.8	75.2
84.2	84.1
84.7	90
85.03	78.8

## Sheet: Panel D
LGN 1617 RFP (-) T0	LGN 1617 RFP (-) T60	LGN 1617 RFP (+) T0	LGN 1617 RFP (+) T60
2.911	5.33	1.282	2.17
4.492	4.399	1.322
5.145	2.726	1.643	4.97
6.246	8.446	2.386	3.327
6.34		2.7	2.3
6.5	4.2	2.94	5.15
7.196	18.991	3.013	2.179
8.948	6.874	3.039	4.376
10.587	8.044	3.106	4.949
10.8	6.6	3.8	1.55
11.889	6.938	3.9	5
16.738	5.117	4.185	3.013
16.928		4.185	2.121
18.3	1.8	4.764
27.81	73.69	4.934	12.095
29.291	13.945	5.247	5.44
32.276	9.689	5.44
34.542	16.428	7.125
36.746	8.83	9.077	8.555
41.1	3.1	9.151	4.038
42.332	7.193	9.562	15.267
42.709	11.094	10.008	4.316
43.259	25.2	10.22	6.129
48.18	15.282	10.62
49.399	67.537	11.346	8.638
50.947		11.76	3.691
55.368	71.983	12.778	5.823
55.491	11.342	14.094	10.62
56.147	20.947	15.286	5.612
58.9	85.9	15.846	8.842
59.421	25.467	15.945	5.08
61.407	61.411	17.8	12.829
61.748	73.703	17.873	2.698
65.854	85.914	18.497	8.996
69.061	80.977	19.144	8.39
71.565	61.963	19.44	17.354
72.35	75.624	19.544	2.083
73.39	89.048	21.227	23.629
74.932	64.22	25.845	9.216
75.486		27.019	13.416
75.767	79.905	27.717	12.588
77.574		29.935
81.18	80.471	30.964	5.747
83.82	86.82	31.125	11.675
83.893	90	36.539	8.13
83.991		40.03	19.365
84.56		40.966	18.007
84.56	82.648	42.709	16.553
85.058	86.492	46.223	51.554
87.614	85.663	46.548	26.21
88.152	89.394	53.752	30.819
89.775	78.104	54.545	33.384
88.152	86.543	58.1	27.9
		60.75	36.5
		76.345
		79.655	50.059

## Sheet: Panel E
Scramble RFP + E16.5 (T0)	Scramble + E16.5 (T60)	LGN 1617 RFP - E16.5 (T0)	LGN 1617 RFP - E16.5 (T60)	LGN 1617 RFP + E16.5 (T0)	LGN 1617 RFP + E16.5 (T60)
8.1	10.9	2.911	5.33	1.282	2.17
49.1	26.4	4.492	4.399	1.322	1.884
37.5	5.7	5.145	2.726	1.643	4.97
58.9	16.3	6.246	8.446	2.386	3.327
15.5	5.8	6.5	4.2	2.7	2.3
10.6	3.9	7.196	18.991	2.94	5.15
10.1	3.1	8.948	6.874	3.013	2.179
16.3	6.1	10.587	8.044	3.039	4.376
31.2	2.9	10.8	6.6	3.106	4.949
16.6	5.9	11.889	6.938	3.8	1.55
43.1	16.6	16.738	5.117	3.9	5
40	19.1	16.928	3.759	4.185	3.013
59.66	24.6	18.3	1.8	4.185	2.121
32.2	12.5	27.81	5.454	4.934	12.095
38.9	10.3	29.291	13.945	5.247	5.44
45.7	22.4	32.276	9.689	9.151	4.038
19.1	8.1	34.542	16.428	9.562	15.267
45	8.4	36.746	8.83	10.008	4.316
47.9	15.3	41.1	3.1	10.22	6.129
19.8	4.5	42.332	7.193	11.76	3.691
27.6	9	42.709	11.094	12.778	5.823
49	55	43.259	25.2	14.094	10.62
24.6	5.6	48.18	15.282	15.286	5.612
11.4	0.7	55.491	11.342	15.846	8.842
24.1	18.9	56.147	20.947	15.945	5.08
41.6	13	59.421	25.467	17.8	12.829
11.7	11.9	61.407	61.411	17.873	2.698
83.8	75.2	49.399	67.537	18.497	8.996
77.8	79.3	55.368	71.983	19.144	8.39
84.7	90	58.9	85.9	19.44	17.354
70	81.5	61.748	73.703	19.544	2.083
77.6	87.5	65.854	85.914	21.227	23.629
79.6	85.1	69.061	80.977	25.845	9.216
70.3	89.558	71.565	61.963	27.019	13.416
75.3	79.03	72.35	75.624	27.717	12.588
64.3	81.5	73.39	89.048	29.935	9.184
84.2	84.1	74.932	64.22	30.964	5.747
67.4	79	75.767	79.905	31.125	11.675
39.8	78.6	81.18	80.471	36.539	8.13
81.4	79.6	83.82	86.82	40.03	19.365
85.03	78.8	83.893	90	40.966	18.007
		84.56	82.648	41.103	15.255
		85.058	86.492	42.709	16.553
		87.614	85.663	46.223	51.554
		88.152	89.4	46.548	26.21
		89.8	78.104	54.545	33.384
		88.1	86.543	58.1	27.9
				53.752	30.819
				60.75	36.5
				79.655	50.059
