# Supplementary material for: Telophase correction refines division orientation in stratified epithelia
Source: eLife. 2019 Dec 13;8:e49249. doi: 10.7554/eLife.49249 (PMC6959978; doi:10.7554/eLife.49249)
Supplement: Figure 3—source data 1. [file elife-49249-fig3-data1.xlsx]

## Sheet: Panel B,C
Contact WT E16.5 (T0)	Contact WT E16.5 (T60)	No Contact WT E16.5 (T0)	No Contact WT E16.5 (T60)
2.4	2.2	27.8	21.7
2.4	8.1	40.5	74.2
3.4	1.9	50.6	76.8
4.2	0.8	51.1	71.5
4.5	4.6	52.7	81.8
6.2	8.2	53.6	78.9
6.2	4.7	55.2	68.8
9.3	5.6	55.3	70.9
9.8	3.7	56.3	76.6
9.9	4.3	56.7	73
11.6	7.8	58.5	82.5
12.5	1.1	58.7	80.6
13.1	9.4	59.7	78.8
14.2	2.6	60.5	74.3
16	10.1	61.8	74.6
21.6	16.6	62.8	78.8
22.2	8.3	63.4	78.7
24.8	2	64.3	76.4
24.9	12.3	65.8	82.9
24.9	10.3	66.7	73.6
25.8	3.366	67.2	74.8
30.5	9.6	67.4	75.1
31	13.9	68.1	88.2
32	14.5	68.9	86.8
32.3	9.7	71	73.4
33	7.3	71.1	74.3
33.6	9.1	71.6	81.1
34.7	5.4	73.1	80.1
38.7	15.7	73.1	74.3
40.391	8.973	73.6	84.9
40.62	17.1	73.8	72.9
41.514	6.36	75.4	80.3
42.5	22.1	75.9	86.7
42.5	27.7	83	89
42.8	15.3	83.1	83.7
43	28.4	83.2	88
45	14.3	84.4	84
47.2	13.5	84.6	83.3
48.7	39.8	85.8	89.6
49.6	12.7	86.1	86.6
51.7	15.7	86.5	89
51.8	2.9	87.7	87.7
52.3	33.2	88.6	88.2
52.3	4.8	88.9	89.3
55.6	13.1	89.3	89.1
58.7	13.4	89.6	85.5

## Sheet: Panel D
pMLC2 Apical (WT)	pMLC2 Foot (WT)
12	15.5
16.4	23.7
20.905	23.18
8.3	12.4
13.3	23
4.4	8.9

## Sheet: Panel F
WT a18 (foot)	WT a18 (apical daughter)
12.011	4.034
9.823	7.322
21.401	16.822
21.927	17.954
25.363	8.537
7.301	3.708
27.96	13.853
22.8	17.94

## Sheet: Panel G
WT a18:aCat (foot)	WT a18:aCat (basal daughter)	WT a18:aCat (apical daughter)	WT a18:aCat (BIN)	WT a18:aCat (daughter 1)	WT a18:aCat (daughter 2)	WT a18:aCat (BIN)	WT a18:aCat (Mitotic)	WT a18:aCat (BIN)
0.91401	0.702338	0.446931	0.768883	0.535297	0.501543	0.681725	0.670746	0.681725
0.649326	0.625349	0.526914	0.508571	0.648947	0.588961	0.663609	0.533552	0.629849
0.884778	1.06155	0.666007	0.956053	0.497327	0.586801	0.605996	0.702084	0.761856
1.30518	0.879679	0.831512	1.11786	0.99885	1.11322	0.903641	0.777715	0.803851
0.922291	0.539984	0.385871	0.635155	0.891278	1.05489	0.829061	0.712919	0.887883
1.08581	0.722779	0.489182	0.477796	0.65034	0.796663	0.69901	0.992876	0.818284
0.920706	0.810478	0.597112	0.805212	1.35616	0.664494	0.796128	0.934362	0.872749
1.0617	0.682209	0.783817	0.792146	0.482638	0.62428	0.3795	0.850162	0.762259
				0.494325	0.74155	0.733406
				0.437577	0.410571	0.542904
