# Supplementary material for: Telophase correction refines division orientation in stratified epithelia
Source: eLife. 2019 Dec 13;8:e49249. doi: 10.7554/eLife.49249 (PMC6959978; doi:10.7554/eLife.49249)
Supplement: Figure 4—source data 1. [file elife-49249-fig4-data1.xlsx]

## Sheet: Panel B
Scramble (Vcl; 8 hour)	aCat 912 (Vcl; 8 hour)
56.3445	35.8344
97.0091	42.4948
107.824	66.4796
88.0735	23.1333
95.3728	48.471
131.678	54.0797
68.5533	40.2543
113.915	65.1032
86.3506	56.961
108.402	64.2182
108.49	89.0991
127.951	33.958
115.788	61.5098
138.85	74.9003
129.944	44.9021
126.128	34.6109
84.069
73.2456
76.6652
61.5545
174.366
128.531
142.625

## Sheet: Panel C
Scramble (a18:aCat)	Vcl 3466 (a18:aCat)	Vcl 2803 (a18:aCat)
1.38831	0.953353	0.734272
1.26569	1.09496	0.826115
1.30722	0.633951	0.834584
1.83971	0.947378	0.87417
1.46373	0.940012	0.865988
1.13442	0.92185	0.695484
1.46731	0.905446	0.870063
0.942124	0.939862	0.948451
1.32971	0.774448	0.740477
1.40883	0.762034	1.21951
1.31221	0.794329	0.712141
1.34055	0.879442	0.929847
1.47357	0.672216	0.937424
1.16039	0.565601	0.750644
1.43252	0.526889	0.778896
1.59736	0.88317	1.14076
2.18854	0.806094	0.677152
1.37487	0.579285	0.673654
1.50139	0.737938	0.586229
1.52716	0.685001	0.75273
1.27145
1.80967
1.6795

## Sheet: Panel E
Scramble (8 hour)	Vcl 3466 (8 hour)	aCat 912 (8 hour)	Vcl 2803 (8 hour)
0.805643	0.2	0.161905	0.594595
0.365482	0.308271	0.323672	0.563877
0.681319	0.144928	0.391892	0.309322
0.954545	0.462264	0.395349	0.408759
0.435754	0.526882	0.365546	0.408696
0.985507	0.295775	0.523132	0.177273
0.745247	0.564655	0.560538	0.0875576
0.969565	0.507143	0.573427	0.10119
0.975207	0.527778	0.200913	0.171271
0.894569	0.676136	0.164062	0.342593
0.705394	0.44335	0.47546	0.233333
0.767123	0.705584	0.233645	0.404145
0.846154	0.158416	0.120536	0.133028
0.768595	0.502008	0.416667	0.34507
0.938053	0.184549	0.273885	0.35533
0.904	0.305732	0.287293	0.326633
0.923077	0.276923	0.39645	0.471366
0.653595	0.447005	0.270073	0.293651
0.825137	0.303704	0.476852	0.619632
0.957944	0.149254	0.231132	0.251208
		0.449782	0.247423
		0.224

## Sheet: Panel G
WT:WT	KO:KO
0.524064	0.112613
0.352727	0.26601
0.506173	0.325373
0.884615	0.42
0.956522	0.111429
0.898374	0.338164
0.587571	0.691781
0.596939	0.514184
0.66967	0.31
0.970464	0.401575
0.740506	0.212871
0.897196	0.595041
0.924242	0.131086
0.911017	0.510949
0.789954	0.513699
0.926667	0.645161
0.666667	0.783951
0.559701	0.441176
0.861635	0.430108
0.75
0.831776
0.839623
0.826087

## Sheet: Panel H
Distance from Junction	Afdn fl/fl Cre RFP (WT:WT, Phalloidin 8 hour)			Afdn fl/fl Cre RFP (KO:KO, Phalloidin 8 hour)
-5	21.2955	11.262	23	43.6868	20.1397	19
-4.9	22.2916	10.8261	23	43.8005	21.5977	19
-4.7	22.3299	12.1966	23	43.333	20.0152	19
-4.6	23.5193	11.0152	23	43.5314	20.8494	19
-4.5	24.6685	11.7681	23	44.9698	20.3695	19
-4.3	25.9319	11.8241	23	45.0434	20.3559	19
-4.2	26.1903	12.3665	23	46.1481	21.8506	19
-4.1	26.6143	13.738	23	46.1013	23.0142	19
-3.9	26.3594	12.0038	23	51.5666	24.6262	19
-3.8	27.3293	11.1764	23	51.8838	27.1347	19
-3.7	27.6533	11.0869	23	52.0236	27.0544	19
-3.5	26.2026	12.5394	23	53.2061	27.0417	19
-3.4	26.0447	12.7616	23	52.5979	26.3861	19
-3.2	28.0965	13.8559	23	54.0506	26.704	19
-3.1	29.3621	15.6512	23	51.6792	26.1454	19
-3	29.667	14.643	23	51.2184	26.0663	19
-2.8	31.0733	14.0906	23	53.6996	25.6808	19
-2.7	32.5961	14.927	23	53.4701	24.3071	19
-2.6	33.3957	16.0052	23	54.3059	23.2035	19
-2.4	34.1228	16.1963	23	56.1694	24.5408	19
-2.3	34.9933	15.695	23	57.958	24.2536	19
-2.2	34.6642	17.0298	23	57.0327	23.6562	19
-2	35.7037	16.4402	23	56.9109	22.9784	19
-1.9	37.4174	17.9248	23	59.3153	26.1618	19
-1.8	36.6509	19.9284	23	59.001	28.1149	19
-1.6	37.1332	18.1929	23	57.1049	30.0307	19
-1.5	38.9318	19.476	23	57.4764	32.1217	19
-1.4	38.6118	18.9954	23	56.8131	32.8788	19
-1.2	39.0572	18.0141	23	55.175	36.3019	19
-1.1	40.3715	17.7933	23	54.5666	34.0724	19
-1	42.6084	17.6747	23	54.07	33.4731	19
-0.8	48.216	18.8484	23	55.3481	29.061	19
-0.7	52.4772	19.0757	23	56.5439	27.6192	19
-0.6	57.4641	21.6556	23	58.5942	26.0215	19
-0.4	72.4604	26.5544	23	61.9414	25.7363	19
-0.3	79.0985	28.1732	23	68.8778	27.7454	19
-0.2	86.0516	33.2724	23	70.8911	28.6583	19
0	92.5907	36.3892	23	74.0319	29.2879	19
0.1	90.5467	37.7939	23	75.4815	31.3918	19
0.2	87.2697	36.9714	23	73.9205	31.0209	19
0.4	73.6844	36.0859	23	66.1391	32.758	19
0.5	68.4139	32.7359	23	62.9504	30.2992	19
0.6	62.6153	31.5607	23	60.2806	32.7622	19
0.8	52.1649	27.381	23	56.8671	33.2878	19
0.9	48.1835	24.8193	23	56.6251	31.2046	19
1.1	45.0426	21.2822	23	54.1644	32.6712	19
1.2	43.4964	22.3938	23	54.3714	34.3867	19
1.3	43.8655	23.5173	23	54.7019	35.1832	19
1.5	40.0747	23.287	23	52.2227	32.4836	19
1.6	40.0411	23.2249	23	52.7182	31.3554	19
1.7	39.4989	22.4549	23	53.5069	32.664	19
1.9	37.5605	22.5811	23	53.165	29.9691	19
2	36.2342	22.2835	23	53.5057	28.8775	19
2.1	36.2716	23.2468	23	54.285	26.9859	19
2.3	33.7592	21.3825	23	56.0794	29.3188	19
2.4	32.5114	19.4961	23	56.3768	29.0586	19
2.5	32.2385	19.7674	23	54.1381	27.8443	19
2.7	31.2402	19.1078	23	54.3388	28.7585	19
2.8	30.1316	17.5335	23	56.0041	31.0698	19
2.9	28.054	16.6309	23	54.1138	29.8421	19
3.1	27.5278	16.5202	23	54.1067	27.4246	19
3.2	27.0515	17.6572	23	52.3612	27.9258	19
3.3	26.1451	15.4786	23	52.3296	26.9476	19
3.5	25.9559	14.9429	23	51.4945	26.9559	19
3.6	24.4313	14.6989	23	51.0408	27.3678	19
3.7	24.7488	14.3313	23	51.9384	26.8473	19
3.9	24.0583	13.7587	23	50.9879	29.1872	19
4	24.4738	12.7012	23	48.6525	29.3717	19
4.1	24.7855	13.2812	23	47.8068	28.2121	19
4.3	26.0157	14.6964	23	46.656	27.7965	19
4.4	25.7137	14.6526	23	46.4952	27.7054	19
4.5	26.0918	14.496	23	45.13	27.5695	19
4.7	24.1362	15.1184	23	43.1248	27.6538	19
4.8	22.6368	12.9602	23	42.0309	27.8422	19
4.9	21.5721	13.4605	23	43.3123	28.6616	19

## Sheet: Panel I
Afdn fl/fl (a18:aCat)	Afdn cKO (a18:aCat)	Scramble (a18:aCat)	Afdn 2711 (a18:aCat)
1.60885	0.854374	1.38831	1.30734
1.18637	1.16905	1.26569	1.30691
1.54963	1.08804	1.30722	1.0857
1.54329	1.11122	1.83971	0.981433
1.30469	0.983886	1.46373	0.699844
2.05919	1.10473	1.13442	1.00171
1.61629	0.838441	1.46731	0.724318
1.77197	0.755762	0.942124	1.11328
1.68732	0.813958	1.32971	1.00608
1.20872	0.978972	1.40883	1.40023
1.40046	0.975086	1.31221	1.04149
1.28683	0.907995	1.34055	0.820472
1.98318	0.750497	1.47357	1.34329
1.62271	0.617919	1.16039	1.29314
1.44373	1.02751	1.43252	1.05935
1.37117	1.46958	1.59736	0.519896
1.29563	1.05119	2.18854	0.85097
2.02911	0.867306	1.37487	0.974789
		1.50139
		1.52716
		1.27145
		1.80967
		1.6795
