# Supplementary material for: Telophase correction refines division orientation in stratified epithelia
Source: eLife. 2019 Dec 13;8:e49249. doi: 10.7554/eLife.49249 (PMC6959978; doi:10.7554/eLife.49249)
Supplement: Figure 5—source data 1. [file elife-49249-fig5-data1.xlsx]

## Sheet: Panel D
Ctnna1 912 RFP+	Ctnna1 912 WT Littermates
1.5	85.8
76.6	86.9
50.3	77.9
4.5	1.6
62.7	65
58.6	85.9
67.8	7.2
39.3	66.4
66.1	79.3
29.2	50.4
4	3
28.2	12.1
35.1	3.5
16.7	16.3
38.7	10.1
1	3.6
43.1	7.4
0.5	83.5
1.6	86.3
62.9	75.8
84.9	85.6
26.5	4.2
67.3	89.5
73	6.3
17	88.6
2.2	7.2
26.1	87.8
3.4	84.6
32.9	68.2
88.4	89.1
52.6	87.7
81	56.2
2.7	81.9
68.2	63.7
88.9	84.1
57.7	72.8
57.7	23.1
70	53.2
28.7	74
52.2	82.6
5.5	2.2
66.1	44.7
77.6	84.7
84.8	70.3
31	58.1
60.5	84.8
51.3	37.6
61.3	1.8
89.9	89
1	1.3
68.5	84
42.4	9.3
51.1	77.1
31.9	84.1
4.6	5.7
28	5
50.3	88.6
65.4	68.4
67.4	3.3
43.7	87
2.6	72.9
42.1	88.1
60.3	0.1
28	0.6
73.8	9
56.9	84.4
41.6	7.7
21.1	3.1
82.9	82.5
50.4	87.5
13.2	51.3
62.9	6.8
30.5	72.3
81.7	16.3
33.3
81
58.9
59.3

## Sheet: Panel E
Vcl 2803 RFP+	Vcl 2803 WT	Vcl 2803 RFP-
89	84.6	33.8
69.8	62.8	24.8
17.3	1	19.7
65.7	15.5	82.6
60.4	10.3	79.2
78.5	9.7	73.5
66.8	11	30.1
1.3	88.9	88.3
19.2	14.7	74.2
67.2	7.6	77.9
69.3	72.7	5.4
85.4	6.5	88.4
58.6	77.7	58
48.4	14.8	81.6
44.4	88.3	29.7
8	33.8	0.1
13.2	82.3	51.9
2.6	89.4	4.3
80	88.9	6.7
52.2	0.5	9.7
2.1	4	13.6
67.7	72	52.5
33.1	10.2	79.5
49.5	85.1	81.6
14.8	87.9	84.9
53.1	20.4
42.5	11.9
6.5	18
55.8	84.5
9.4	88
20.4	6.7
67	3.2
71.1	31
73	8.7
0.3	5.8
24.5	87
30.1	71.1
40.4	5.8
42.1	8.5
46.5	35.8
	62.5
	62.5
	65.8
	72.1
	75.7
	76.1
	76.8
	77.4
	77.6
	81
	82.2
	87.9
	89.4

## Sheet: Panel F
Vcl 3466 RFP +	Vcl 3466 RFP -	Vcl 3466 WT Littermates
67	7.53	6
40.3	85	51.8
49.6	8	4
42.44	1.1	87.8
40.9	86.1	83.1
89.5	86.3	89.8
72.1	89.9	0.2
53.5	0.9	83.9
42.9	84.3	25.3
49.9	83.9	3
67.2	64	7.2
0.8	10.8	87.8
82	8.9	72.147
56.3	0.8	45.1
40.9	86.2	89.9
17.9	86.4	8.6
75.5	14.6	76.3
33.4	70.3	14.01
2	80.7	85.1
54.6	56.4	87.8
67.7	16.6	5
76.9	88.9	3.4
59.8	72.1	7.1
4.3	4.1	79.4
55.7	4.6	75.1
62.9	8.7
56.6	87
38.8	80.9
37.3	79.6
11.9	1.4
29.2	4.4
2	72.6
36.3	87.5
2.8	84.5
2.1	81.1
35.1	8.7
55.3	5
63.7	13
17.4	53
8.5
58
45.3
44.9
30.2
89.4
57.1
54.2

## Sheet: Panel G
Afdn 2711 RFP+	Afdn 2711 RFP -	Afdn 2711 WT LMs
76.256	2.905	85.711
22.671	12.561	9.314
51.929	12.854	89.492
6.105	22.164	6.522
39.098	88.969	19.617
81.77	81.223	87.446
6.697	86.352	72.501
57.723	60.299	15.127
76.256	2.905	85.711
22.671	12.561	9.314
51.929	12.854	89.492
6.105	22.164	6.522
39.098	88.969	19.617
81.77	81.223	87.446
6.697	86.352	72.501
57.723	60.299	15.127
77.584	14.487	8.617
89.562	86.945	4.706
65.073	5.7	78.316
30.99	3.963	5.278
56.716	72.7735	8.112
48.081	3.864	78.143
75.349	86.432	88.637
68.907	7.749	19.129
60.306	4.23	78.8
23.563	84.167
0.974	9.391
64.058	89.54
16.876	2.539
0.994	78.551
8.022	81.158
79.665	6.727
1.205	85.173
57.505	66.345
10.8	13.459
25.694	12.3
43.662	83.8
64.873	4.4
80.476	2.9
13.8	76.8
45.8	11.5
30.2
42.905
84
44.125
4.5
56.7
48.1
55.9
8.5
76.2
49.7
65.7
36.4
66.6
57.9

## Sheet: Panel H
Cre-RFP (Positive-all)	Afadin Cre-RFP controls (fl/fl
48.5	3.62
22.8	78.1
1.09	86.4
19.5	6.78
25.6	9.35
16.03	85.6
53.9	85.7
53.5	80.2
30	1.59
1.6	2.7
55.8	0.3
52	82.2
1.6	80.2
14.8	3.1
52.6	83.8
44.8	73.2
55.5	2.7
0.9	43.2
3	70.3
31.4	8.7
75.9	12.2
1.3	82.1
80.3	10.2
7.5	6.8
48.3	84.2
39.2	87.7
1	67.5
33.9	86.9
26.9	74.1
3	69.8
46.9	86
3	4.9
10.5	50.3
86.5	4.3
85.5	36.8
60.5	83.5
6.26	1.6
48.4	6.6
55.5	85
2.01	88.6
1.1	1.6
67.9	3.3
3	0.2
3.6	2.4
2	45.2
20.1	83.8
48	13
	8.2
	85.5
	83
	4
	21.5
	82.6
	85.1
	67.6
	1

## Sheet: Panel I
Afdn cKO + Vcl 3466 (RFP+)	Afadin cKO Littermates (fl/fl)	Afdn cKO + Vcl 3466 (RFP-)
22.409	87.66	36.576
7.029	21.8	29.332
60.251	1.7	46.223
18.909	85.2	22.735
8.512	7.9	70.398
0.746	14.2	21.532
24.386	85	3.076
3.567	10.6	6.015
37.331	82	1.864
39.359	8.4	79.063
83.762	85	88.224
35.763	5	67.362
18.187	25.8	5.283
59.625	82.2	83.907
24.071	85.4	83.617
79.278	0.3	19.553
61.122	64.2	57.961
66.297	9.5	66.423
79.078	0.3	21.712
5.783	84.9	61.157
58.929	86.6	19.152
42.75	4.8	36.812
42.369	84.3	39.868
7.548	4.9	2.317
5.128	74.5	75.138
55.754	82.5	58.098
5.003	37.3	38.529
3.964	85.8	2.164
54.481	3.3	71.469
3.951	64.3	83.05
84.968	68.8	2.466
69.519	53.1	14.629
59.349	4.8	38.493
	8.7	14.785
	82.5	0.285
	6.8	70.45
	4.5	29.122
	4	5.174
	77.1	79.587
	1.4	85.215
	80.2	19.31
	85.5
	84.8
	22.1
	80.1
	87.5
	1.9
	83.5
	87.2
	5
	12.5
	68.3
	6.9
	43.8
	89
	3.4
	0.9
	3.3
	0.8
	82
	0.7
	6.6
	83.6
	88.6
	0.8
	81.6
	16.4
	4.8
	4.5
	5.5
	5.2
	3.8
	8.9
	86.7
	5
	0.5
	78.2
	88.1
	2.9
	87.4
	3.9
	10
	21.8
	11.9
	79.5
	9.9
	89.1
	2.6
	78.7
	82.1
	46.3
	81.9
	80.2
	86.6
	3.4
	7
	8.3
	86.2
	83.1
	8
	7.8
	39.5
	10
	4.2
	2.6
	77.4
	5.6
	81.1
	57.4
	5.5
	73
	70.3
	2.5
	74.1
	15.2
	4.6
	77.7
