# Supplementary material for: Telophase correction refines division orientation in stratified epithelia
Source: eLife. 2019 Dec 13;8:e49249. doi: 10.7554/eLife.49249 (PMC6959978; doi:10.7554/eLife.49249)
Supplement: Figure 6—source data 1. [file elife-49249-fig6-data1.xlsx]

## Sheet: Panel B
Ctnna1 912 (WT) T0	Ctnna1 912 (WT) T60	Ctnna1 912 RFP(+) T0	Ctnna1 912 RFP(+) T60
24.9	12.3	64.7	71
75.9	86.7	40.7	36.4
4.2	0.8	18.6	3.3
53.6	78.9	51.8	17.5
42.5	27.7	38.3	17.1
12.5	1.1	31.6	13.8
59.7	78.8	40.9	13.6
87.7	87.7	77.3	66.5
16	10.1	82.1	87.3
55.3	70.9	72.8	76.1
67.4	75.1	67.2	75.9
56.3	76.6	54.3	31.2
50.6	76.8	31.2	38.3
62.8	78.8	78	49.7
31	13.9	40.2	42.5
67.2	74.8	83.3	64.3
71	73.4	73.4	47.1
6.2	4.7	75.5	39.8
66.7	73.6	80.5	73.1
68.1	88.2	78.7	63.4
52.3	33.2	68.2	61.4
42.5	22.1	84.6	72.2
63.4	78.7	77.2	78.3
33	7.3	78.2	80.5
		59	48.8
		73.7	56.3
		39.6	34.2
		64.2	69.4
		65.7	59.5
		50.9	61.3
		62.3	52.7
		43.1	32.4
		66.8	67.2
		55.6	48.7
		31	34.8
		15.7	22
		43.3	38
		24	23.6
		42	29.9
		18.6	5.9
		25.1	23.3
		17.7	5.7
		42	27.8
		5.9	3.3
		5	11.7
		9.1	9
		13.8	1.8
		47.9	47.1
		21.1	8.2
		13.4	13.4
		15.6	21.3
		38.7	32
		34.3	27.3
		6.4	8
		36.5	27.6
		5.1	6.4
		63.2	53.1
		25.4	16.7
		9.9	8.7
		38.5	24.2
		16.4	7.4
		3.1	7.7
		28.8	37.7
		39.8	35
		7	3.5
		55.4	58.7
		13	14.7
		45.2	43.9
		53	60.2
		30.8	43.8
		1.2	3.9
		4.5	3.4
		11.3	11.7
		6.7	25.1

## Sheet: Panel C
Contact Ctnna1 912 WT - E16.5 (T0)	Contact Ctnna1 912 wt - E16.5 (T60)	No Contact Ctnna1 912 WT - E16.5 (T0)	No Contact Ctnna1 912 WT - E16.5 (T60)	Contact Ctnna1 912 RFP + E16.5 (T0)	Contact Ctnna1 912 RFP + E16.5 (T60)	No Contact Ctnna1 912 RFP + E16.5 (T0)	No Contact Ctnna1 912 RFP + E16.5 (T60)
33	7.3	63.4	78.7	24	23.6	77.3	66.5
52.3	33.2	87.7	87.7	42	29.9	82.1	87.3
42.5	22.1	55.3	70.9	18.6	5.9	72.8	76.1
24.9	12.3	67.4	75.1	25.1	23.3	67.2	75.9
16	10.1	75.9	86.7	17.7	5.7	54.3	31.2
4.2	0.8	53.6	78.9	42	27.8	31.2	38.3
42.5	27.7	59.7	78.8	5.9	3.3	78	49.7
12.5	1.1	56.3	76.6	5	11.7	40.2	42.5
6.2	4.7	50.6	76.8	9.1	9	83.3	64.3
31	13.9	62.8	78.8	13.8	1.8	73.4	47.1
		67.2	74.8	47.9	47.1	75.5	39.8
		71	73.4	21.1	8.2	80.5	73.1
		66.7	73.6	13.4	13.4	78.7	63.4
		68.1	88.2	15.6	21.3	68.2	61.4
				38.7	32	84.6	72.2
				34.3	27.3	77.2	78.3
				6.4	8	78.2	80.5
				36.5	27.6	59	48.8
				5.1	6.4	73.7	56.3
				63.2	53.1	39.6	34.2
				25.4	16.7	64.2	69.4
				9.9	8.7	65.7	59.5
				38.5	24.2	50.9	61.3
				16.4	7.4	62.3	52.7
				3.1	7.7	43.1	32.4
				28.8	37.7	66.8	67.2
				39.8	35	55.6	48.7
				7	3.5	31	34.8
				55.4	58.7	15.7	22
				13	14.7	43.3	38
				45.2	43.9
				53	60.2
				30.8	43.8
				1.2	3.9
				4.5	3.4
				11.3	11.7
				6.7	25.1

## Sheet: Panel D
Vcl 3466 RFP (-) T0	Vcl 3466 RFP (-) T60	Vcl 3466 RFP (+) T0	Vcl 3466 RFP (+) T60
1.1	3.7	2.1	5.1
1.2	3.2	2.7	9.1
5.7	3.6	4.6	3.3
8.85		6.3	8.4
11	2	6.4	2.9
12.6	7.1	15.2	16.4
14	6.4	17.4	7.5
14.5	1.4	19.8	9.8
14.8	6.3	20	21.8
17.4	3	21.3	8.8
17.6	10.2	25.6	23.6
22.8	11.3	26.3	31.9
24.4	9.4	28.4	39.7
24.5	13.2	28.6	14.1
25.3	6.2	28.7	38
25.6	2.7	29.1	24.4
25.6	9.5	30.1	27.6
26.6	6.1	32.2	54.4
27.6	10.9	35.2	38
32.4	14.7	35.8	15.6
32.7	12.8	36.8	59.5
33	6.3	39.8	49.5
33.2	17.9	40.8	48.9
36.2	7.6	41.5	55.5
40.3	17.6	42	46.2
40.5	17.6	42	60.6
43	19.3	45	36.4
45.8	24	46.4	35.5
47.5	14.6	47.4	47.9
48.6	18.6	47.5	58.7
49	22	47.7	56
49.7	72.5	48	47.4
51.6	68.4	49.5	42
56.8	28.4	49.9	52.4
59.4	87.8	51.4	58
63.8	33.7	51.5	54.3
66	88.1	51.6	73.7
70.2	13.1	52.7	66.9
71.1		53.5	59.5
75.4	80.4	56	71.3
78.7	84.2	56.2	63.4
79.7	80.3	57.6	67.7
80.2	81.2	59	51
82.8	84.9	59.2	55.7
84.8	83.9	60.1	30.1
85.6	74.1	62.1	51.3
87	85.8	62.2	38.6
		62.48	46.3
		65.1	74.75
		65.4	63.4
		66	52.7
		66	63.5
		68.1	70.1
		69.1	75.3
		69.4	82.9
		70.1	71.1
		74.1	62.6
		75.3	89.3
		75.8	60.5
		77.2	79.3
		78.5	81.5
		79.3	53
		85.1	87.5

## Sheet: Panel E
Contact Vcl 3466 RFP + E16.5 (T0)	Contact Vcl 3466 RFP + E16.5 (T60)	No Contact Vcl 3466 RFP + E16.5 (T0)	No Contact Vcl 3466 RFP + E16.5 (T60)	Contact Vcl 3466 RFP - E16.5 (T0)	Contact Vcl 3466 RFP - E16.5 (T60)	No Contact Vcl 3466 RFP - E16.5 (T0)	No Contact Vcl 3466 RFP - E16.5 (T60)
2.1	5.1	39.8	49.5	1.1	3.7	49.7	72.5
2.7	9.1	41.5	55.5	1.2	3.2	51.6	68.4
4.6	3.3	42	46.2	5.7	3.6	59.4	87.8
6.3	8.4	42	60.6	11	2	66	88.1
6.4	2.9	47.4	47.9	12.6	7.1	75.4	80.4
15.2	16.4	47.5	58.7	14	6.4	78.7	84.2
17.4	7.5	47.7	56	14.5	1.4	79.7	80.3
19.8	9.8	51.6	73.7	14.8	6.3	80.2	81.2
20	21.8	53.5	59.5	17.4	3	82.8	84.9
21.3	8.8	56	71.3	17.6	10.2	84.8	83.9
25.6	23.6	56.2	63.4	22.8	11.3	85.6	74.1
26.3	31.9	57.6	67.7	24.4	9.4	87	85.8
28.4	39.7	59	51	24.5	13.2
28.6	14.1	59.2	55.7	25.3	6.2
28.7	38	62.1	51.3	25.6	2.7
29.1	24.4	65.1	74.75	25.6	9.5
30.1	27.6	66	52.7	26.6	6.1
32.2	54.4	66	63.5	27.6	10.9
35.2	38	68.1	70.1	32.4	14.7
35.8	15.6	69.1	75.3	32.7	12.8
36.8	59.5	69.4	82.9	33	6.3
40.8	48.9	70.1	71.1	33.2	17.9
45	36.4	74.1	62.6	36.2	7.6
46.4	35.5	75.3	89.3	40.3	17.6
48	47.4	75.8	60.5	40.5	17.6
49.5	42	77.2	79.3	43	19.3
49.9	52.4	78.5	81.5	45.8	24
51.4	58	79.3	53	47.5	14.6
51.5	54.3	85.1	87.5	48.6	18.6
52.7	66.9			49	22
60.1	30.1			56.8	28.4
62.2	38.6			63.8	33.7
62.48	46.3			70.2	13.1
65.4	63.4

## Sheet: Panel G
Afdn 2711 RFP +
Time since anaphase	Cell 1	Cell 2	Cell 3	Cell 4	Cell 5	Cell 6	Cell 7	Cell 8	Cell 9	Cell 10	Cell 11	Cell 12	Cell 13	Cell 14	Cell 15	Cell 16
0	85.601	64.08	51.34	31.608	76.959	66.44	33.83	64.654	67.703	81.416	80.538	51.697	87.397	58.57	22.784	12.241
5	84.56	53.837	56.31	26.178	88.152	69.724	17.103	70.615	73.834	83.641	66.425	32.698	87.621	59.744	5.354	4.05
10	87.916	56.65	52.125	25.463	83.035	62.532	25.955	64.966	81.124	80.905	72.036	48.417	89.121	58.241	11.915	4.161
15	87.099	49.494	59.931	26.399	80.552	59.89	28.847	74.56	79.38	87.397	81.953	40.919	79.821	54.162	6.546	1.79
20	89.697	58.362	58.57	26.494	84.753	55.713	37.569	63.598	85.677	83.679	76.165	35.451	85.236	54.615	12.947	5.728
25	79.277	52.28	66.801	16.074	85.157	61.174	40.546	79.796	86.091	78.062	78.728	31.175	82.372	59.036	11.182	4.342
30	88.781	56.782	64.654	16.091	81.951	62.494	40.273	73.94	76.235	79.582	86.186	38.266	89.889	62.354	4.017	7.125
35	84.784	64.518	63.435	13.397	90	57.221	30.51	69.206	65.715	85.458	86.604	29	84.15	63.916	6.752	6.546
40	79.144	60.341	69.146	20.681	87.082	57.415	41.386	51.953	59.775	79.971	85.888	38.985	84.546	67.013	9.203	2.291
45	72.912	56.649	74.358	29.129	85.601	55.961	43.417	63.905	61.095	85.895	86.927	25.866	88.345	65.225	6.473	2.726
50	67.834	65.376	73.072	32.912	82.851	52.406	41.312	70.989	62.12	82.245	86.983	34.361	73.571	63.435	1.821	6.34
55	66.133	68.453	76.608	15.192	83.718	58.68	42.436	60.974	55.635	85.557	76.436	49.887	83.237	66.801	2.996	11.063
60	60.391	64.199	75.964	19.867	83.361	58.986	38.652	53.973	60.957	85.782	80.991	46.491	76.546	66.051	3.865	11.503
Afdn 2711 RFP +
Time since anaphase	Cell 1	Cell 2	Cell 3	Cell 4	Cell 5	Cell 6	Cell 7	Cell 8	Cell 9	Cell 10	Cell 11	Cell 12	Cell 13
0	40.601	12.339	11.094	86.84	41.234	79.641	63.435	73.301	48.366	35.811	34.154	2.632	80.473
5	22.62	5.906	19.983	90	59.036	87.337	46.79	84.806	43.069	24.741	30.069	5.194	74.914
10	18.435	7.125	19.25	88.688	63.435	81.085	44.04	87.295	31.287	18.118	37.526	4.764	75.774
15	13.671	10.305	11.01	84.806	60.945	76.329	25.523	86.153	31.657	16.327	41.165	2.291	71.565
20	5.042	8.807	14.273	86.82	74.745	63.435	20.556	89.042	27.004	19.069	39.207	2.904	79.526
25	13.134	7.125	13.123	89.569	74.745	68.199	23.046	84.806	29.932	18.435	24.775	3.221	85.601
30	12.766	1.685	6.219	76.49	80.455	77.005	17.121	86.424	23.02	16.699	27.408	9.516	81.254
35	11.441	4.728	13.671	77.358	76.026	72.897	24.228	82.763	18.239	20.021	17.969	3.221	85.236
40	8.13	2.663	10.84	83.66	78.064	76.329	20.854	85.815	28.511	11.952	14.123	2.49	80.838
45	8.083	4.038	11.505	87.689	81.158	79.695	22.433	82.875	29.403	22.369	12.529	2.49	77.168
50	7.074	4.699	6.546	75.61	83.089	81.085	23.416		26.565	14.657	5.301	5.711	89.635
55	4.522	4.038	5.11	74.745	79.939	82.875	12.222		29.055	10.457	6.499	3.752	85.601
60	6.71	12.804	9.273	78.69	75.727	82.875	12.133		26.565	11.31	2.726	2.291	85.914

## Sheet: Panel H
Afdn 2711 RFP(+) T0	Afdn 2711 RFP(+) T60	Afdn 2711 RFP(-) T0	Afdn 2711 RFP(-) T60
3.9	14.438	2.632	2.291
4.112	9.462	11.094	9.273
5.886	6.9	12.339	12.804
11.2	11.4	25.02	9.6
12.241	11.503	34.154	2.726
12.529	12.3	35.811	11.31
17.7	9.7	40.601	6.71
21.991	50.194	41.234	19.983
22.784	3.865	41.634	78.69
27.646	43.264	48.366	26.565
29.745	13.055	50.389	13.173
30.324	60.313	52.431	18.435
31.608	19.867	56.31	72.403
33.83	38.652	57.766	7.125
39.806	78.906	60.627	80.599
41.634	48.814	63.435	12.133
43.264	38.271	63.844	9.284
45	38.66	67.1	83.089
48.176	23.02	69.5	85.03
51.34	75.964	73.154	77.905
51.697	46.491	73.301
52.125	26.565	74.422	76.508
54.462	57.995	74.6
54.728	40.14	77.905	82.776
58.57	66.051	78.338	83.855
59.036	59.72	78.5	78.6
60.945	32.651	78.69	81.787
61.39	37.1	79.641	82.875
63.8	22.879	79.9	75.8
64.08	64.199	80.227	81.87
64.654	53.973	80.473	85.914
65.632	70.95	83.121	88.977
66.44	58.986	83.606	79.019
67.05	75.7	85.426	73.301
67.2	68	86.84	78.69
67.703	60.957	87.709	85.236
68.199	57.907	87.735	86.844
70	73.3	89.24	83.411
70.1	61
71.565	62.021
76.959	83.361
77.071	58.521
77.3	62.4
77.947	49.493
78.187	81.38
78.69	48.814
80.538	80.991
81.416	85.782
83.04	84.289
84.289	45
84.8	80.7
84.898	85.536
85.186	81.254
85.601	60.391
87.397	76.546
88.788	77.292

## Sheet: Panel I
	Oblique ARC
Afdn 2711 RFP (+)	-1.5886	18.6497	15
LGN 1617 RFP (+)	21.5004	9.08682	12
Vcl 3466 RFP (+)	-5.26071	10.6571	28
Scramble RFP (+)	22.164	20.0935	15
Ctnna1 912 RFP(+)	7.03846	20.0935	13

## Sheet: Panel J
Contact Afdn 2711 RFP - E16.5 (T0)	Contact Afdn 2711 RFP - E16.5 (T60)	No Contact Afdn 2711 RFP - E16.5 (T0)	No Contact Afdn 2711 RFP - E16.5 (T60)	Contact Afdn 2711 RFP + E16.5 (T0)	Contact Afdn 2711 RFP + E16.5 (T60)	No Contact Afdn 2711 RFP + E16.5 (T0)	No Contact Afdn 2711 RFP + E16.5 (T60)
2.632	2.291	41.634	78.69	3.9	14.438	21.991	50.194
11.094	9.273	56.31	72.403	4.112	9.462	23.962	61.858
12.339	12.804	60.627	80.599	5.886	6.9	27.646	43.264
25.02	9.6	67.1	83.089	11.2	11.4	30.324	60.313
34.154	2.726	69.5	85.03	12.241	11.503	39.806	78.906
35.811	11.31	74.422	76.508	12.529	12.3	41.634	48.814
40.601	6.71	78.338	83.855	17.7	9.7	43.264	38.271
41.234	19.983	78.5	78.6	22.784	3.865	45	38.66
48.366	26.565	78.69	81.787	29.745	13.055	51.34	75.964
50.389	13.173	79.641	82.875	31.608	19.867	51.697	46.491
52.431	18.435	79.9	75.8	33.83	38.652	52.125	26.565
57.766	7.125	80.227	81.87	48.176	23.02	58.57	66.051
63.435	12.133	80.473	85.914			59.036	59.72
63.844	9.284	83.121	88.977			60.945	32.651
		83.606	79.019			61.39	37.1
		85.426	73.301			63.8	22.879
		86.84	78.69			64.08	64.199
		87.709	85.236			64.654	53.973
		87.735	86.844			65.632	70.95
		89.24	83.411			66.44	58.986
						67.05	75.7
						67.2	68
						67.703	60.957
						68.199	57.907
						70	73.3
						70.1	61
						71.565	62.021
						76.959	83.361
						77.071	58.521
						77.3	62.4
						77.947	49.493
						80.538	80.991
						81.416	85.782
						84.289	45
						84.8	80.7
						84.898	94.464
						85.601	60.391
						87.397	76.546
						96.96	84.289
