# Supplementary material for: Telophase correction refines division orientation in stratified epithelia
Source: eLife. 2019 Dec 13;8:e49249. doi: 10.7554/eLife.49249 (PMC6959978; doi:10.7554/eLife.49249)
Supplement: Figure 7—source data 1. [file elife-49249-fig7-data1.xlsx]

## Sheet: Panel B
Proportion of Perimeter	Afadin fl/fl			Afadin cKO
0	2.40507	3.79345	30	3.98068	8.70157	37
0.01	1.967	3.18431	30	3.45729	6.88109	37
0.02	1.88858	3.0175	30	3.02883	5.54495	37
0.03	1.88309	2.93345	30	3.33423	6.79689	37
0.04	2.12944	3.51498	30	3.2725	6.08558	37
0.05	2.04189	3.85078	30	3.16863	5.83801	37
0.06	2.24382	4.5541	30	3.34858	5.94743	37
0.07	2.62002	3.8856	30	3.0107	5.61665	37
0.08	2.59628	4.18386	30	3.12912	5.95317	37
0.09	2.33894	4.25539	30	2.81667	4.11639	37
0.1	1.70935	3.45744	30	3.084	4.33097	37
0.11	1.56177	2.60126	30	2.85209	3.57894	37
0.12	1.75497	3.76292	30	3.22182	4.73774	37
0.13	2.22959	5.1086	30	3.46277	4.44766	37
0.14	2.03436	2.86388	30	3.18455	3.45757	37
0.15	1.59771	2.33294	30	3.01339	3.23473	37
0.16	1.91934	2.46819	30	3.14735	3.5574	37
0.17	1.79817	2.36419	30	3.13745	3.26354	37
0.18	1.89258	2.76453	30	2.9589	3.32169	37
0.19	2.52788	2.77539	30	2.96373	3.71084	37
0.2	3.10067	3.34151	30	3.07947	5.24404	37
0.21	3.07931	4.13096	30	2.54434	4.28233	37
0.22	2.65125	3.22855	30	2.76032	4.5991	37
0.23	2.46088	3.09736	30	3.16334	4.30256	37
0.24	2.87035	3.922	30	3.08518	3.97237	37
0.25	2.87857	4.84213	30	3.97053	4.78367	37
0.26	3.40915	6.5944	30	4.49524	5.6591	37
0.27	2.97321	4.77002	30	4.28206	5.02975	37
0.28	3.19674	4.9206	30	4.25999	5.55414	37
0.29	4.20522	7.05921	30	4.51902	6.49815	37
0.3	4.18071	7.00257	30	4.80958	6.86395	37
0.31	5.06601	12.2138	30	5.15869	5.80907	37
0.32	5.916	12.0059	30	6.73127	8.85348	37
0.33	6.44208	9.2115	30	9.33738	16.0956	37
0.34	8.18272	9.98674	30	9.99441	18.5712	37
0.35	8.67464	10.2804	30	12.6126	18.1744	37
0.36	12.6443	19.3528	30	14.4285	19.4483	37
0.37	17.1821	30.8231	30	17.4873	21.8925	37
0.38	17.5811	36.908	30	19.186	26.4367	37
0.39	17.6513	32.7589	30	17.2164	20.3784	37
0.4	21.5872	33.6702	30	18.1038	18.6356	37
0.41	23.8999	37.396	30	20.3702	20.7316	37
0.42	27.1357	36.0131	30	23.712	23.8248	37
0.43	31.9194	40.1647	30	26.3287	25.8002	37
0.44	33.6235	38.513	30	27.8884	29.1329	37
0.45	30.7662	28.9222	30	29.3334	32.0407	37
0.46	35.7041	32.7811	30	30.8589	34.2525	37
0.47	35.8308	31.4285	30	34.6712	39.2913	37
0.48	34.3401	29.3908	30	41.9955	48.2479	37
0.49	38.4214	33.3162	30	43.575	40.3548	37
0.5	37.4762	32.368	30	47.6433	38.8784	37
0.51	42.6666	35.2883	30	49.8621	41.6975	37
0.52	40.3806	36.4061	30	47.5956	41.6019	37
0.53	41.2932	39.3819	30	40.2755	33.9897	37
0.54	45.0727	38.631	30	41.0686	34.8062	37
0.55	41.2134	30.9465	30	40.6897	34.1948	37
0.56	41.197	40.0616	30	40.8698	34.8685	37
0.57	39.7259	40.4108	30	43.5954	38.4842	37
0.58	33.1358	35.2124	30	46.5969	49.0852	37
0.59	31.9807	31.1879	30	41.8647	46.2262	37
0.6	33.1856	28.4868	30	36.6585	40.2695	37
0.61	34.9598	32.6432	30	33.7162	35.3503	37
0.62	33.4405	31.9094	30	32.3321	32.4906	37
0.63	27.1182	27.3478	30	31.7913	32.9102	37
0.64	24.1664	23.3742	30	28.0054	31.6582	37
0.65	26.7022	33.0515	30	23.5972	26.7868	37
0.66	27.3039	42.4897	30	22.9775	29.1009	37
0.67	22.3305	33.8455	30	21.6252	26.5707	37
0.68	20.1299	31.4518	30	21.7336	27.5319	37
0.69	15.699	23.6121	30	20.3525	28.8057	37
0.7	13.7657	21.8124	30	16.8416	22.4982	37
0.71	10.4276	13.5613	30	14.2913	22.9003	37
0.72	8.23411	11.4137	30	11.8815	19.0811	37
0.73	7.79215	12.9327	30	11.8747	21.5469	37
0.74	5.97722	9.60464	30	11.6551	22.7022	37
0.75	6.076	11.7668	30	8.90298	15.0908	37
0.76	3.80504	6.5405	30	7.54228	10.8268	37
0.77	3.37543	5.82257	30	6.40674	7.51883	37
0.78	2.90826	4.01511	30	6.16085	7.07599	37
0.79	2.70268	3.90111	30	6.43907	8.68854	37
0.8	2.35952	3.5085	30	5.89982	7.46013	37
0.81	1.78544	2.23136	30	5.21211	6.69377	37
0.82	1.96811	2.44103	30	5.02969	5.8721	37
0.83	1.81881	2.50041	30	5.17241	6.32961	37
0.84	1.99138	2.5933	30	4.92065	6.48189	37
0.85	2.16202	2.39207	30	4.36596	6.23281	37
0.86	1.96039	1.83181	30	3.92363	5.3541	37
0.87	1.78612	2.11811	30	3.72657	5.07085	37
0.88	2.56434	3.20292	30	3.36493	4.71873	37
0.89	2.58198	3.35936	30	3.32728	4.2328	37
0.9	2.70216	3.97835	30	3.44433	4.43752	37
0.91	2.12775	3.04445	30	3.49614	4.97487	37
0.92	2.21932	3.03698	30	3.49634	4.78915	37
0.93	1.91893	2.81463	30	3.83203	4.93712	37
0.94	1.49416	1.82493	30	3.96003	4.25648	37
0.95	1.56345	1.88614	30	3.59838	4.06765	37
0.96	1.82108	2.15237	30	3.46967	4.56739	37
0.97	2.1175	2.27828	30	3.34905	4.63873	37
0.98	2.26218	2.49925	30	3.34917	3.94168	37
0.99	2.10317	2.69825	30	3.07567	3.64032	37
1	2.24168	2.67976	30	3.02328	3.79821	37

## Sheet: Panel C
Afadin (fl/fl)	Afadin cKO	Afdn 2711 (WT)	Afdn 2711 (RFP+)	Ctnna1 912 (WT)	Ctnna1 912 (RFP+)	Vcl 3466 (WT)	Vcl 3466 (RFP+)	Vcl 2803 (WT)	Vcl 2803 (RFP+)
171.3	179.46	176.25	176.05	126.05	176.5	173.65	173.508	167.75	163.8
167.15	157.35	164.85	169.4	164.8	167.65	172.5	171.689	179.75	171.6
147.55	160.25	155.25	135.55	162.7	178.9	144.25	154.911	177.4	148.45
149.95	169.6	174.75	154.65	177.5	133.3	152.3	164.129	156.2	172.15
157.55	124.85	167.9	171	176.15	169.7	151.75	179.506	175.45	156.75
152.8	153.2	173	178.7	174.45	157.45	165.65	176.563	167.6	168.75
170.4	126.7	156.65	174.6	167.75	157.7	175.8	178.325	162.5	107.85
171.45	176.15	167.9	173.7	168	162	165.85	172.11	172.2	141.95
174.6	143.7	180	157.75	176.95	177.45	157.55	159.95	176.8	175.35
165.35	177.25	156.7	136.9	175.9	169.3	153.25	164.35	173.5	158.5
142.05	177.95	179.3	170.8	178.85	176.05	169.75	122.1	167.4	119.1
177.45	178.05	168.6	171.95	165.45	179.5	167.25	176.2	167.8	172.6
178.9	173.45	171.85	178.65	179.85	174.3	178.45	169.95	134.85	118.8
108.4	148.1	177.6	176.65	173.4	175.5	177.75	178.1	163.25	129
136.25	159.85	176.15	178.15	170	159.95	174.8	175.2	130.1	178.8
175.1	177.75	117.95	173.1	171.3	158.15	172.65	171.35	105.1	151.2
174.25	157.8	175.5	169.15	159.65	179.35	127	174.75	174.35	175.1
153.9	171.5	163.55	172.3	174.95	135.5	154.1		149.7	176.3
172.45	78.3	132.15	160.85	101.55	179.3	142.15		175.55	161.25
170.15	176.35	159.45	168.25	166.25		162.35		169.15	150.2
154.65	172.95	142.55	170.35	152.35		155.85		161.05	175.65
171.5	163.05	150.6	145.9	113.3		38.15		175.9	178.15
158.35	72.65	179.1	152.25	167.75		171.15		166.95	122.55
164.95	169.55	167.4	116.7	125.3		176.5		158.7	179.7
157.2	169.7	152.8	162.25	175		176.8		105.7
168.65	177.4	104.85	169.5	150.15		158.55		170.9
159.3	169.15		176.05	149.2		172.55		169.6
167.35	164.15		175.8	179.7		156.65		49.4
161.15	172.4		149.3	171.2		164.65		121.3
162	176.05		125.7	178.35		159.85		162.4
148	153.25		172.75	165.75		20.1		176.55
139	166.05		172.7	179.5		154.1		176.05
163	174.95		131.2	86.95		174.95		27.2
168	175.75		169.8	170.95		179.55
151	165.25		152.25	174.25		159.3
142	167		176.1	175.7		179.9
176	177		170.2	170.95		169.7
119	176		172.4	170.3		110.35
177	175			170.9
145	170			166.2
136	164			132.45
154	169			146
177	160			172.6
178	173			174.45
147	149			174.85
143	139			57.9
172	164
172	165
164	161
172	140
116	180
166	152
133	125
166	140
162	119
163	166
160	168
164	174
156	156
149	161
	151
	164
	168
	137
	143
	160
	156
	165
	169
	137
	170
	147

## Sheet: Panel D
Ratios						Counts
	Apical	Weak/Absent	Other				Apical	Weak/Absent	Other
Afadin fl/fl	0.540984	0.426229	0.0327869			Afadin cKO (Count)	66	52	4
Afadin cKO	0.514286	0.438095	0.0476191			Afadin fl/fl (Count)	54	46	5
Afdn 2711 WT	0.575	0.35	0.075			Afdn 2711 WT	23	14	3
Afdn 2711 RFP (+)	0.660377	0.283019	0.0566038			Afdn 2711 RFP (+)	35	15	3
Ctnna1 912 WT	0.522388	0.38806	0.0895522			Ctnna1 912 WT	35	26	6
Ctnna1 912 RFP (+)	0.580645	0.354839	0.064516			Ctnna1 912 RFP (+)	18	11	2
Vcl 2803 WT	0.351351	0.554054	0.0945946			Vcl 2803 WT	26	41	7
Vcl 2803 RFP+	0.431818	0.454545	0.113636			Vcl 2803 RFP+	19	20	5
Vcl 3466 WT	0.55	0.35	0.1			Vcl 3466 WT	33	21	6
Vcl 3466 RFP+	0.533333	0.4	0.0666667			Vcl 3466 RFP+	16	12	2

## Sheet: Panel F
Afdn fl/fl (Metaphase)	Afdn cKO (Metaphase)	Afdn fl/fl (Telophase)	Afadin cKO (Telophase)	Afdn 2711 (Telophase; WT)	Afdn 2711 (Telophase; RFP+)
2.95	1	0.7	61.925	26.8	21.05
18.7	28.2	2.3	112.45	9.3	50.05
11.675	26.9	44.825	41.325	25.7	24.35
14.25	77.8	21.525	20.1	10.05	25.75
7.925	7.8	5.175	88.2	24.05	21.2
70.85	7.6	10.325	51.25	29	6.9
40.95	6.5	7.35	23.95	0.95	30.45
1.9	12.35	10.225	74.375	11.45	44.9
20.1	40.525	6.1	47.725	15.75	20.6
7	1.175	3.575	11.1	4.45	43.45
14.275	71.65	11.325	78.35	9.15	15.7
2.375	33.15	4.625	79.325	8.2	38.2
2.05	18.85	8.7	87.85		71.1
4.75	17.25	22.925	35.05		49.3
2.525	4.1	8.025	9.4
12.175	1.225	22.175	1.7
1.2	6.15	7.125	17.475
6.95	19.1	13.6	73.85
6.95	13.95	8.7	48.15
30.9	0.375		28.1
2.5	4.675		21.775
8.775	12.55		43.75
23.075	17.275		8.925
1.525	16.425		34.275
21.825	23.45		4.275
35.825	25.3		74.825
6.15	9.3		38.325
2.475	6.925		47.475
5.275	6.6		3.05
5.3			25.3
3.25			36.9
14.9			38.125
			36.25
			63.925
			17.625
			27.225
			36.075
			4.425
			4.925
			83.6
			28.125
			15.525
			44.825
			7.35
			21.15

## Sheet: Panel H
AfdncKO LGN 1617 (RFP+)	Afdnfl LGN 1617 (RFP+)	AfdncKO LGN Controls	Afdnfl LGN Controls
15.8165	13.2425	20.8872	19.4654
27.9508	14.3777	25.5454	19.0642
18.5447	12.0016	22.7527	34.1936
18.8892	16.4518	28.2601	17.8817
18.441	13.4893	26.8683	30.5029
19.1553	10.6894	24.7212	31.9866
21.215	14.2468	18.9657	26.6733
20.7581	12.4915	23.6441	29.0864
15.0291	16.6816	23.5203	31.5141
21.4198	9.69735	18.4423	23.0422
20.0312	18.153	27.4974	19.5267
24.7109	11.7108	28.4409	21.7404
23.8612	12.28	19.777	21.1106
19.6636	12.5649	17.0618	23.0372
26.785	18.0505	16.0891	21.2199
20.3364	17.9976	22.5679	32.1543
20.5656	16.8097	23.5073	31.1258
20.8233	18.5949	23.6387	24.4979
29.5738	14.9342	31.4734	23.1389
22.8508	19.9813	26.5065	27.1239
28.4896	18.8157	29.0167	32.9848
26.6092	14.1214	28.3038
28.6381	12.2287	35.9962
27.1158	13.146	31.7725
21.8852	15.1088
17.2597
16.8461
13.6043
13.9741
20.1071
15.2548
13.6686
15.4404

## Sheet: Panel I
AfdncKO LGN 1617 (RFP+)	Afdnfl LGN 1617 (RFP+)	AfdncKO LGN Controls	Afdnfl LGN Controls
7.295	10.772	39.912	87.345
6.997	4.866	89.964	1.956
9.951	30.687	33.777	85.754
13.924	13.073	42.646	6.923
61.607	4.313	26.565	3.244
67.815	34.588	50.619	17.162
89.177	17.156	65.795	70.333
18.904	24.935	46.572	55.413
11.113	4.332	75.147	5.263
56.395	43.295	2.847	1.906
26.406	4.326	36.764	8.509
88.115	46.943	16.827	11.976
54.277	49.905	5.352	88.076
7.18	3.554	69.536	2.708
24.083	12.695	89.656	3.636
69.086	54.007	16.417	11.136
13.931	7.352	55.105	70.171
86.877	2.692	45.562	79.223
80.025	86.478	6.625	68.912
29.839	30.528	3.515	82.048
18.9	25.373	89.369	75.027
43.341	16.327	3.725	8.948
6.138	8.169	7.58	9.362
37.251	20.382	75.625	79.154
71.289	35.178	58.592	71.284
20.517	24.597	39.986	80.806
30.577	3.241	48.651	14.019
82.214	7.211	53.005	81.308
60.055	11.992	67.41	14.079
50.024	8.75	59.638	11.614
60.915	28.15	22.304	10.45
22.701	5.05	65.578	89.822
46.927	37.411	61.279	4.112
16.894	11.8	32.766	2.053
30.805	63.274	66.18	72.46
48.793	8.784	77.661	19.903
56.754	5.907	66.912	2.951
25.343	30.165	43.234	4.311
61.496	83.463	8.155	64.263
39.182	22.153	27.72	75.091
17.893	19.367	71.718	16.08
6.134	12.278	36.606	71.043
66.794	8.776	49.498	0.839
20.952	83.104	53.061	9.958
8.583	4.898	86.305	68.859
25.927	63.186	36.686	87.328
36.666	7.369	62.176	19.511
5.146	23.109	49.865	11.429
67.49	3.257	16.916	5.839
3.348	12.897	32.89	5.461
24.975	19.073	47.078	88.041
63.186	86.321	32.842	4.297
45.837	7.097	65.743	81.312
25.581	20.916	49.104	1.727
66.407		3.884	75.029
9.066		89.427	85.711
66.203		73.632	14.968
47.432		46.959	53.116
37.076		55.661	77.056
31.848		3.173	89.591
14.594		23.096	11.217
8.094		53.357	85.424
45.453		27.049	74.64
59.901		50.666	85.078
61.079		74.661	81.885
51.513		61.385	77.813
77.397		80.951	19.497
82.456		7.562	12.463
62.403		87.205	12.159
2.649		47.097	0.805
69.31		22.679	77.201
18.017		42.051	88.779
67.36		81.249	84.348
87.595		86.741	14.65
87.568		72.354	18.191
11.143		8.102	6.652
67.982		45.348	88.568
65.017		47.562	75.283
89.22		4.448	33.659
1.506		79.803	9.931
78.947		69.408	4.064
76.21		2.094	89.399
11.63		4.524	4.487
3.187		79.272	87.262
12.544		61.535	85.115
1.868		88.095	61.659
16.295		11.017	3.715
8.663		12.808	87.593
59.977		17.583	78.408
53.8		35.053	69.896
34.257		56.132	84.296
4.031		26.127	0.723
31.01		2.891	78.112
2.679		16.721
37.928		76.38
12.027		16.125
88.585		65.693
46.997		17.416
40.279		9.258
63.655		87.583
64.722		28.259
3.406		7.957
75.103		8.587
27.081		86.47
74.705		21.442
61.331		56.197
		60.716
		9.776
		54.552
		66.505
		67.604
		85.845
		4.666
		78.046
		4.109
		74.902
		66.351
		57.538
		47.595
		84.382
		47.617
		76.018
		37.923
		44.942
