# Supplementary material for: Telophase correction refines division orientation in stratified epithelia
Source: eLife. 2019 Dec 13;8:e49249. doi: 10.7554/eLife.49249 (PMC6959978; doi:10.7554/eLife.49249)
Supplement: Figure 8—source data 1. [file elife-49249-fig8-data1.xlsx]

## Sheet: Panel B
WT E14.5 (T0)	WT E14.5 (T60)
34.2	14.9
32.6	9.5
21	2
40.8	11.3
40	15.2
27.7	14.3
22.5	5.8
53.6	18.4
56.3	19.6
10.7	9.9
55.7	15.1
4	9.3
53.5	14.1
43.6	15.1
27.8	18.9
36.9	26.6
11.8	0.7
3.7	2.3
4.3	5.3
4	3.5
19	6.9
57.6	11.2
1.7	1.3
5	8.3
7.9	5.7
14.8	2.7
6.1	3.5
40.2	9.5
30.9	1.8
15.6	5.3
37.4	14.8
20	22.4
25.7	17.1
27.9	1.5
26.6	12.2
55	16.3
7.4	14
18.4	8.5
37.5	10.6
36.4	8.1
9.9	2.5
51.5	28.4
5.3	5.2
5.4	7.8
28.5	2.5
36.3	7.1
34.3	1
14.3	14.5
33.9	1
37.5	5.1
37.4	19.5
26.6	4
10	12.6
40.9	15.2
58.2	67.2
63.6	49.4
48.4	52.8
36.9	33.6
52.6	67.6
34.7	51.8
57.1	20.9
70.7	85.1
46.2	43.2
43.4	50.1
22.5	25.5
50.1	50
68.9	88.8
83.5	88.4
73.5	36.5
78	57.3
70.2	59.5
59.9	33.7
52.1	44.2
51.5	65.5
70	62.2
27.6	23.2
5.3	24.8
43.8	79.2

## Sheet: Panel C
Contact WT E14.5 (T0)	Contact WT E14.5 (T60)	No Contact WT E14.5 (T0)	No Contact WT E14.5 (T60)
34.2	14.9	58.2	67.2
32.6	9.5	63.6	49.4
21	2	48.4	52.8
40.8	11.3	36.9	33.6
40	15.2	52.6	67.6
27.7	14.3	34.7	51.8
22.5	5.8	57.1	20.9
53.6	18.4	70.7	85.1
56.3	19.6	46.2	43.2
10.7	9.9	43.4	50.1
55.7	15.1	22.5	25.5
4	9.3	50.1	50
53.5	14.1	68.9	88.8
43.6	15.1	83.5	88.4
27.8	18.9	73.5	36.5
36.9	26.6	78	57.3
11.8	0.7	70.2	59.5
3.7	2.3	59.9	33.7
4.3	5.3	52.1	44.2
4	3.5	51.5	65.5
19	6.9	70	62.2
57.6	11.2	27.6	23.2
1.7	1.3	5.3	24.8
5	8.3	43.8	79.2
7.9	5.7
14.8	2.7
6.1	3.5
40.2	9.5
30.9	1.8
15.6	5.3
37.4	14.8
20	22.4
25.7	17.1
27.9	1.5
26.6	12.2
55	16.3
7.4	14
18.4	8.5
37.5	10.6
36.4	8.1
9.9	2.5
51.5	28.4
5.3	5.2
5.4	7.8
28.5	2.5
36.3	7.1
34.3	1
14.3	14.5
33.9	1
37.5	5.1
37.4	19.5
26.6	4
10	12.6
40.9	15.2

## Sheet: Panel E
Ctnna1 912 WT Basal	Ctnna1 912 RFP POS Basal	Ctnna1 912 WT SB	Ctnna1 912 RFP POS SB
0.106089	0.151057	0.0184502	0.181269
0.11236	0.158297	0.0561798	0.141921
0.0939664	0.13267	0.0296736	0.110558
0.0930233	0.104586	0.0361757	0.144811
0.111871	0.10919	0.0372902	0.181984
0.0937989	0.154512	0.0729547	0.166873
0.0993724	0.146819	0.0575314	0.184883
0.12685	0.111421	0.089852	0.118384
0.118435	0.101387	0.0566426	0.0960512
0.11994	0.118216	0.0649675	0.145083
0.105634	0.112554	0.0754527	0.121212
0.104634	0.115357	0.0448431	0.129776
0.111055	0.121889	0.0555275	0.106653
0.123126	0.111576	0.14454	0.153417
0.113147	0.127137	0.123922	0.127137
0.117208	0.101642	0.117208	0.125098
0.12952	0.124708	0.107933	0.124708
0.119543	0.114841	0.109148	0.123675
0.12118	0.10879	0.0842993	0.100087
0.114613	0.119686	0.0620821	0.0949236
0.120426	0.13805	0.0972672	0.133736
0.119701	0.124913	0.074813	0.104094
0.137335	0.113285	0.0610376	0.118435
0.115	0.114286	0.055	0.103896
0.115108	0.101061	0.0239808	0.0808489
0.117869	0.106816	0.0518623	0.0966429
0.11117		0.0476443
0.104315		0.0237079
0.0922131		0.0409836
0.0978953		0.0293686
0.105033		0.0306346

## Sheet: Panel F
WT Basal Density	WT SBD	2711 Basal Density	2711 SBD
0.0870087	0.0180018	0.117917	0.0917131
0.0943396	0.0157233	0.0673174	0.0235611
0.0763825	0.0183318	0.0927406	0.0511672
0.0704451	0.00960615	0.115533	0.0673941
0.114114	0.0690691	0.125767	0.0981595
0.0895819	0.0630392	0.117684	0.0477099
0.0800739	0.0677549	0.083903	0.0186451
0.0956149	0.0725354	0.126921	0.0968604
0.0919842	0.0591327	0.114703	0.0903719
0.0741696	0.0096743	0.112626	0.0385299
0.0854701	0.0102564	0.109341	0.0843486
0.0708502	0.0101215	0.127454	0.0930072
0.085034	0.0102041	0.128888	0.10367
0.0832428	0.014477	0.126773	0.126773
0.108161	0.0753851	0.108426	0.0960347
0.0798935	0.0479361	0.106456	0.0927198
0.0844496	0.0611532	0.116242	0.0548918
0.0894354	0.0251537	0.111748	0.114613
0.117188	0.163352
0.123288	0.157534
0.112063	0.131839
0.128125	0.11875
0.130682	0.0710227
0.12928	0.055905
0.104493	0.0522466
0.124178	0.0693937
0.128875	0.0592128
0.102837	0.0390071
0.111671	0.0792507
0.112197	0.0579081
0.119085	0.0564086
0.0991408	0.0528751

## Sheet: Panel H,I
Clone Genotype	Basal Count	SB Count	SB:Basal Cell Ratio
Afdn 2711	1	1	1
Afdn 2711	1	1	1
Afdn 2711	1	2	2
Afdn 2711	1	3	3
Afdn 2711	2	1	0.5
Afdn 2711	2	1	0.5
Afdn 2711	2	3	1.5
Afdn 2711	2	1	0.5
Afdn 2711	2	3	1.5
Afdn 2711	2	3	1.5
Afdn 2711	2	1	0.5
Afdn 2711	2	3	1.5
Afdn 2711	2	3	1.5
Afdn 2711	3	1	0.3
Afdn 2711	3	1	0.3
Afdn 2711	3	4	1.3
Afdn 2711	3	0	0
Afdn 2711	4	0	0
Afdn 2711	4	5	1.3
Afdn 2711	4	3	0.8
Afdn 2711	5	3	0.6
Afdn 2711	5	3	0.6
Afdn 2711	5	5	1
Afdn 2711	6	7	1.2
Afdn 2711	6	3	0.5
WT	1	1	1
WT	2	2	1
WT	2	1	0.5
WT	2	0	0
WT	2	1	0.5
WT	2	0	0
WT	2	1	0.5
WT	2	1	0.5
WT	2	1	0.5
WT	2	3	1.5
WT	3	1	0.3
WT	3	1	0.3
WT	3	1	0.3
WT	3	2	0.7
WT	3	1	0.3
WT	3	3	1
WT	3	3	1
WT	3	0	0
WT	4	2	0.5
WT	4	2	0.5
WT	4	3	0.8
WT	6	3	0.5
WT	9	4	0.4
