# Supplementary material for: Telophase correction refines division orientation in stratified epithelia
Source: eLife journal article supplement (doi:10.7554/elife.49249), 2019-12-13
Supplement: supp [file elife-49249-supp-v1.zip]

Archive with 16 entries (16 files):
- elife_poa_e49249_Figure_1_video_2.avi
- elife_poa_e49249_Figure_1_figure_supplement_1.tif
- elife_poa_e49249_Figure_1_video_4.avi
- elife_poa_e49249_Transparent_Reporting_File.pdf
- elife_poa_e49249_Figure_8_figure_supplement_1.tif
- elife_poa_e49249_Figure_3_figure_supplement_1.tif
- elife_poa_e49249_Figure_4_figure_supplement_1.tif
- elife_poa_e49249_Figure_5_figure_supplement_1.tif
- elife_poa_e49249_Figure_7_figure_supplement_2.tif
- elife_poa_e49249_Figure_6_figure_supplement_1.tif
- elife_poa_e49249_Figure_1_video_3.avi
- elife_poa_e49249_Figure_6_video_1.avi
- elife_poa_e49249_Figure_1_video_1.avi
- elife_poa_e49249_Figure_7_figure_supplement_1.tif
- elife_poa_e49249_Figure_6_video_2.avi
- elife_poa_e49249_Figure_6_video_3.avi
