# Supplementary figures and images for: Telophase correction refines division orientation in stratified epithelia
Source: eLife journal article supplement (doi:10.7554/elife.49249), 2019-12-13

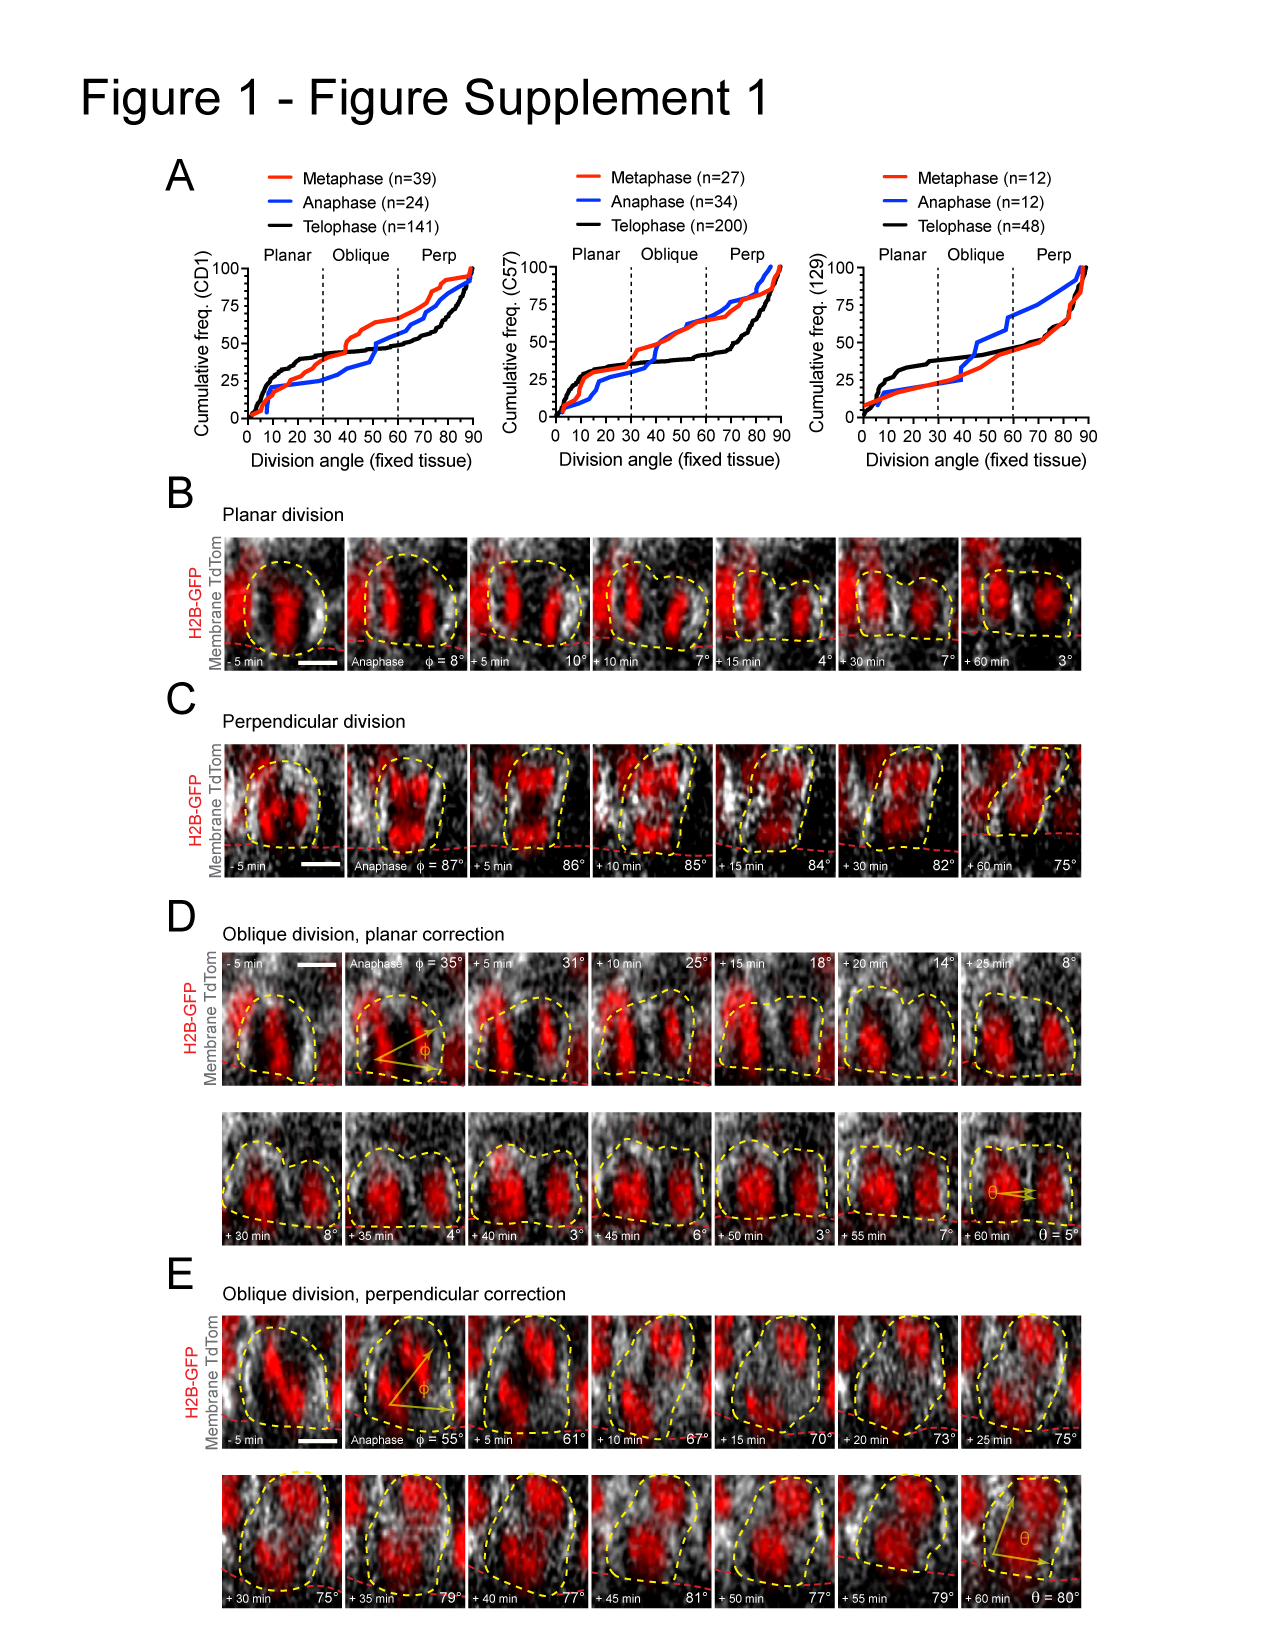

Supplement: supp [file elife-49249-supp-v1.zip › elife_poa_e49249_Figure_1_figure_supplement_1.tif]

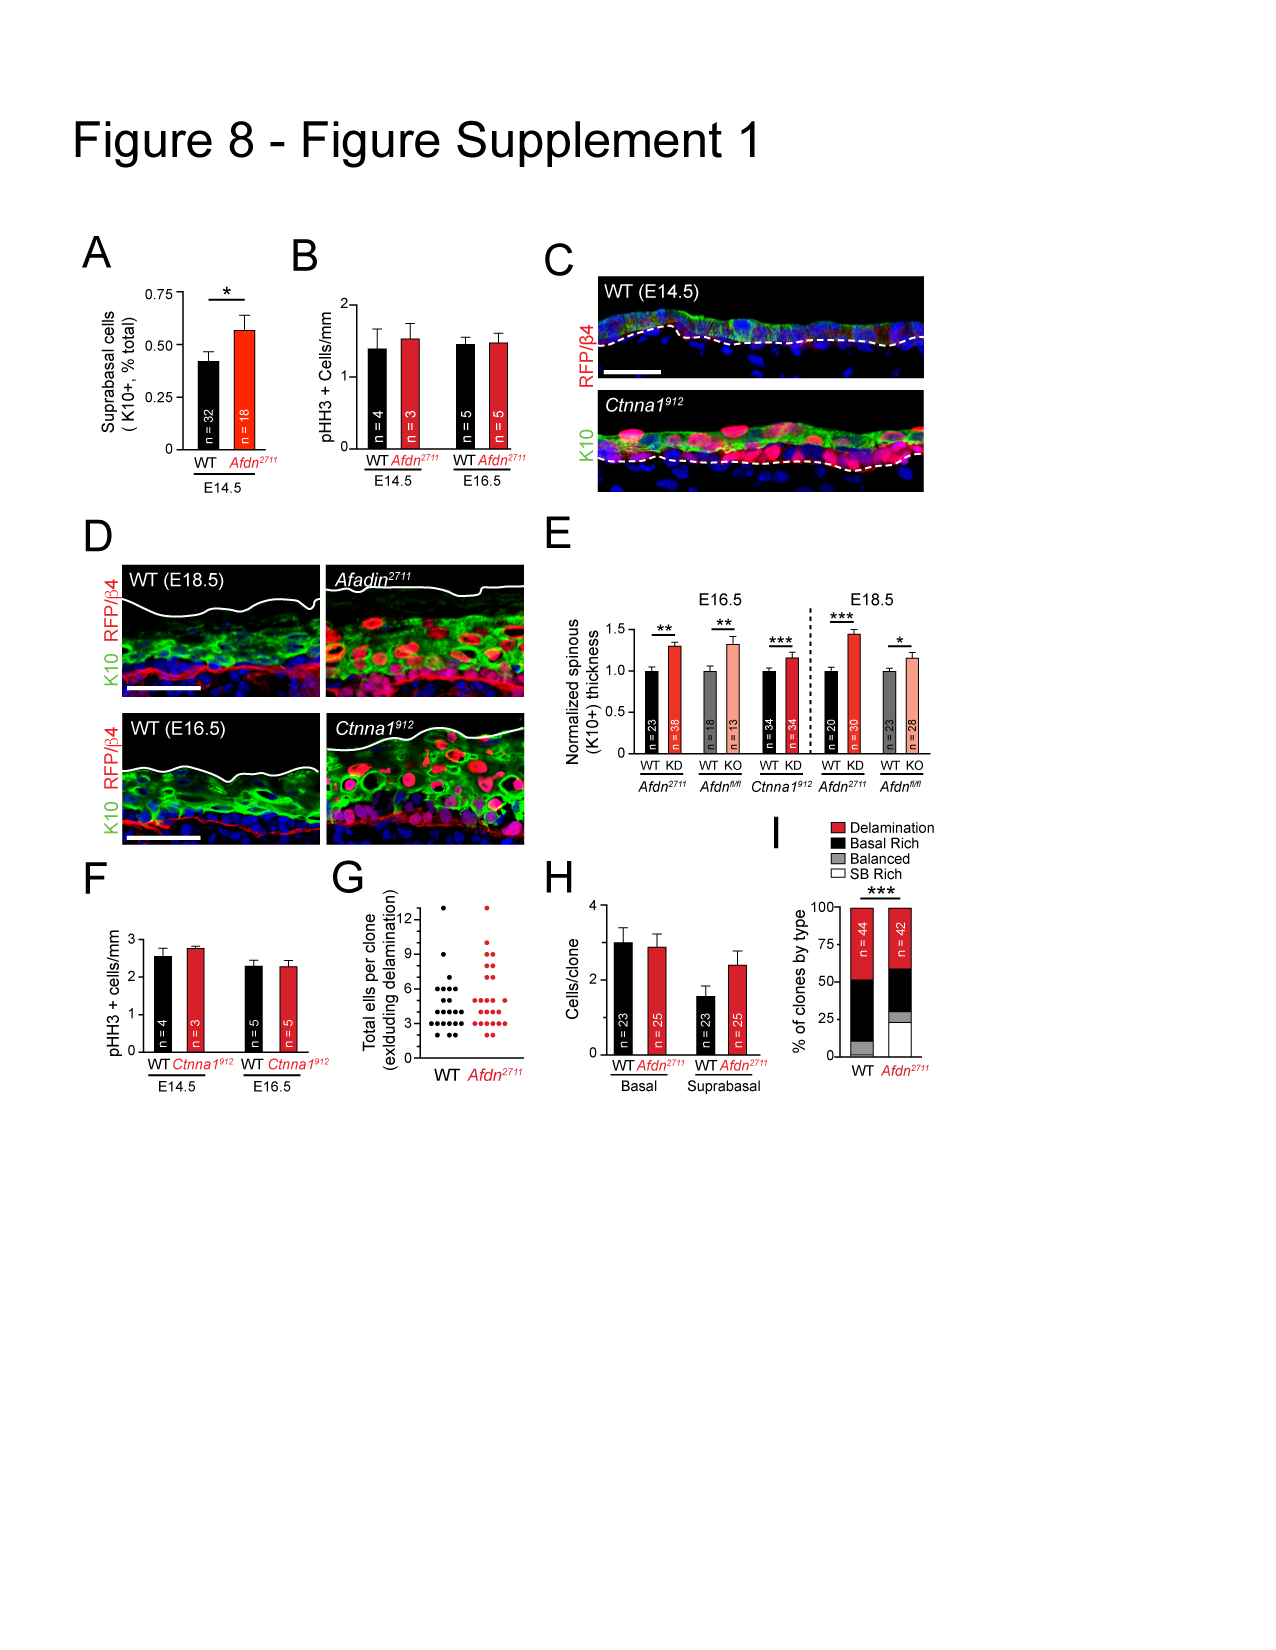

Supplement: supp [file elife-49249-supp-v1.zip › elife_poa_e49249_Figure_8_figure_supplement_1.tif]

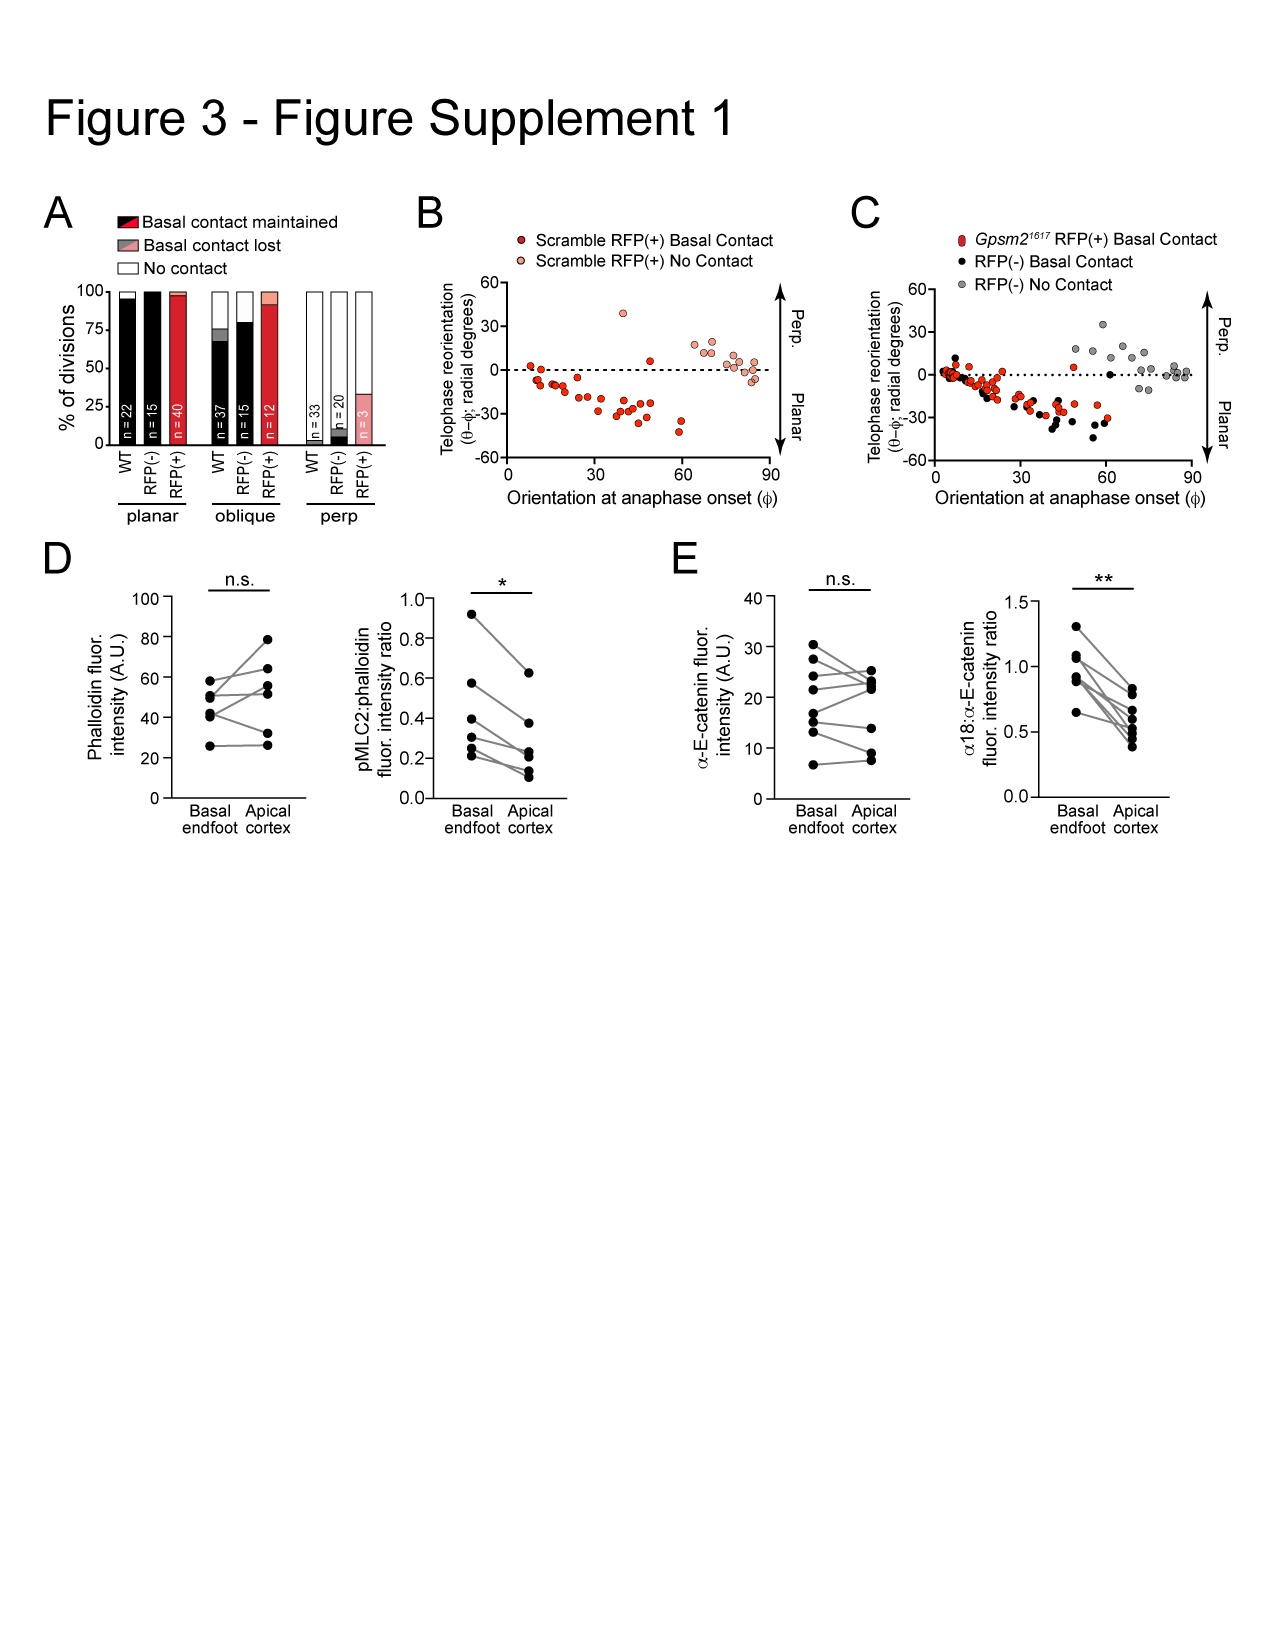

Supplement: supp [file elife-49249-supp-v1.zip › elife_poa_e49249_Figure_3_figure_supplement_1.tif]

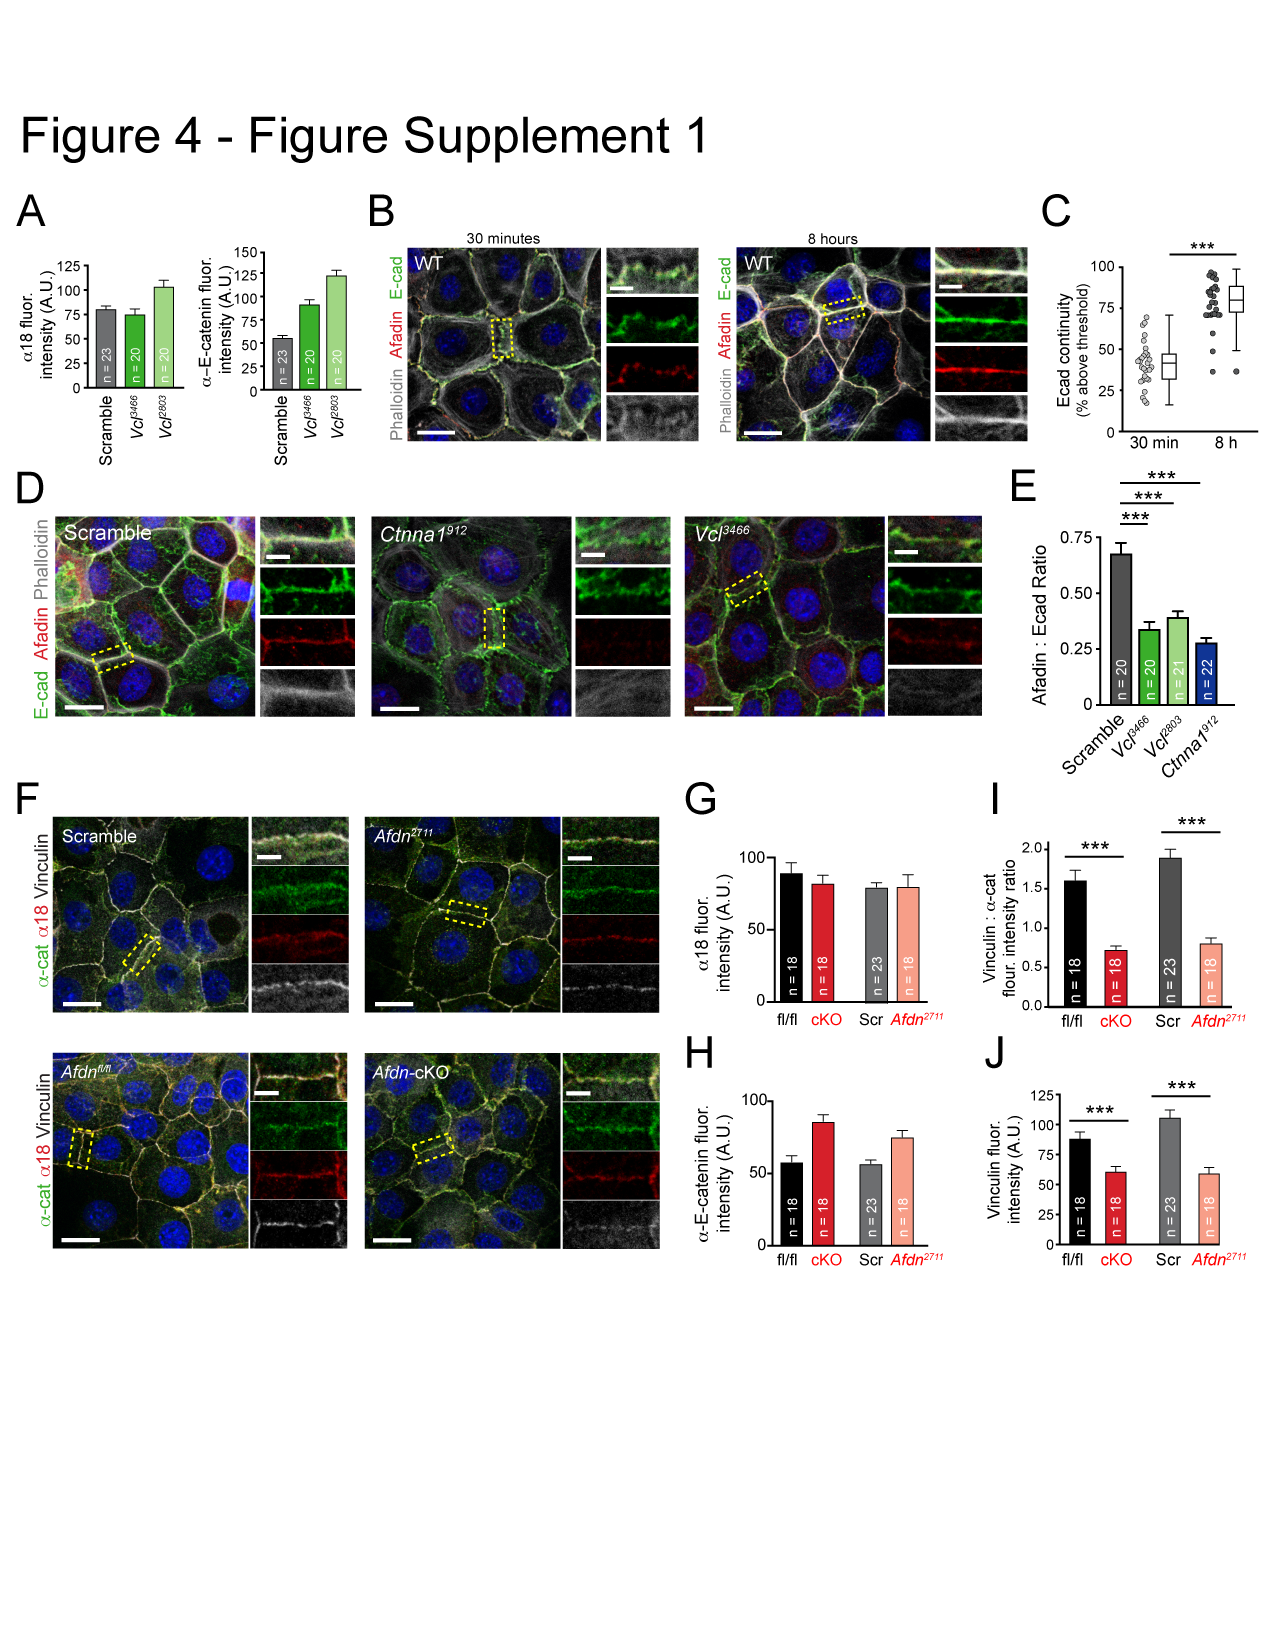

Supplement: supp [file elife-49249-supp-v1.zip › elife_poa_e49249_Figure_4_figure_supplement_1.tif]

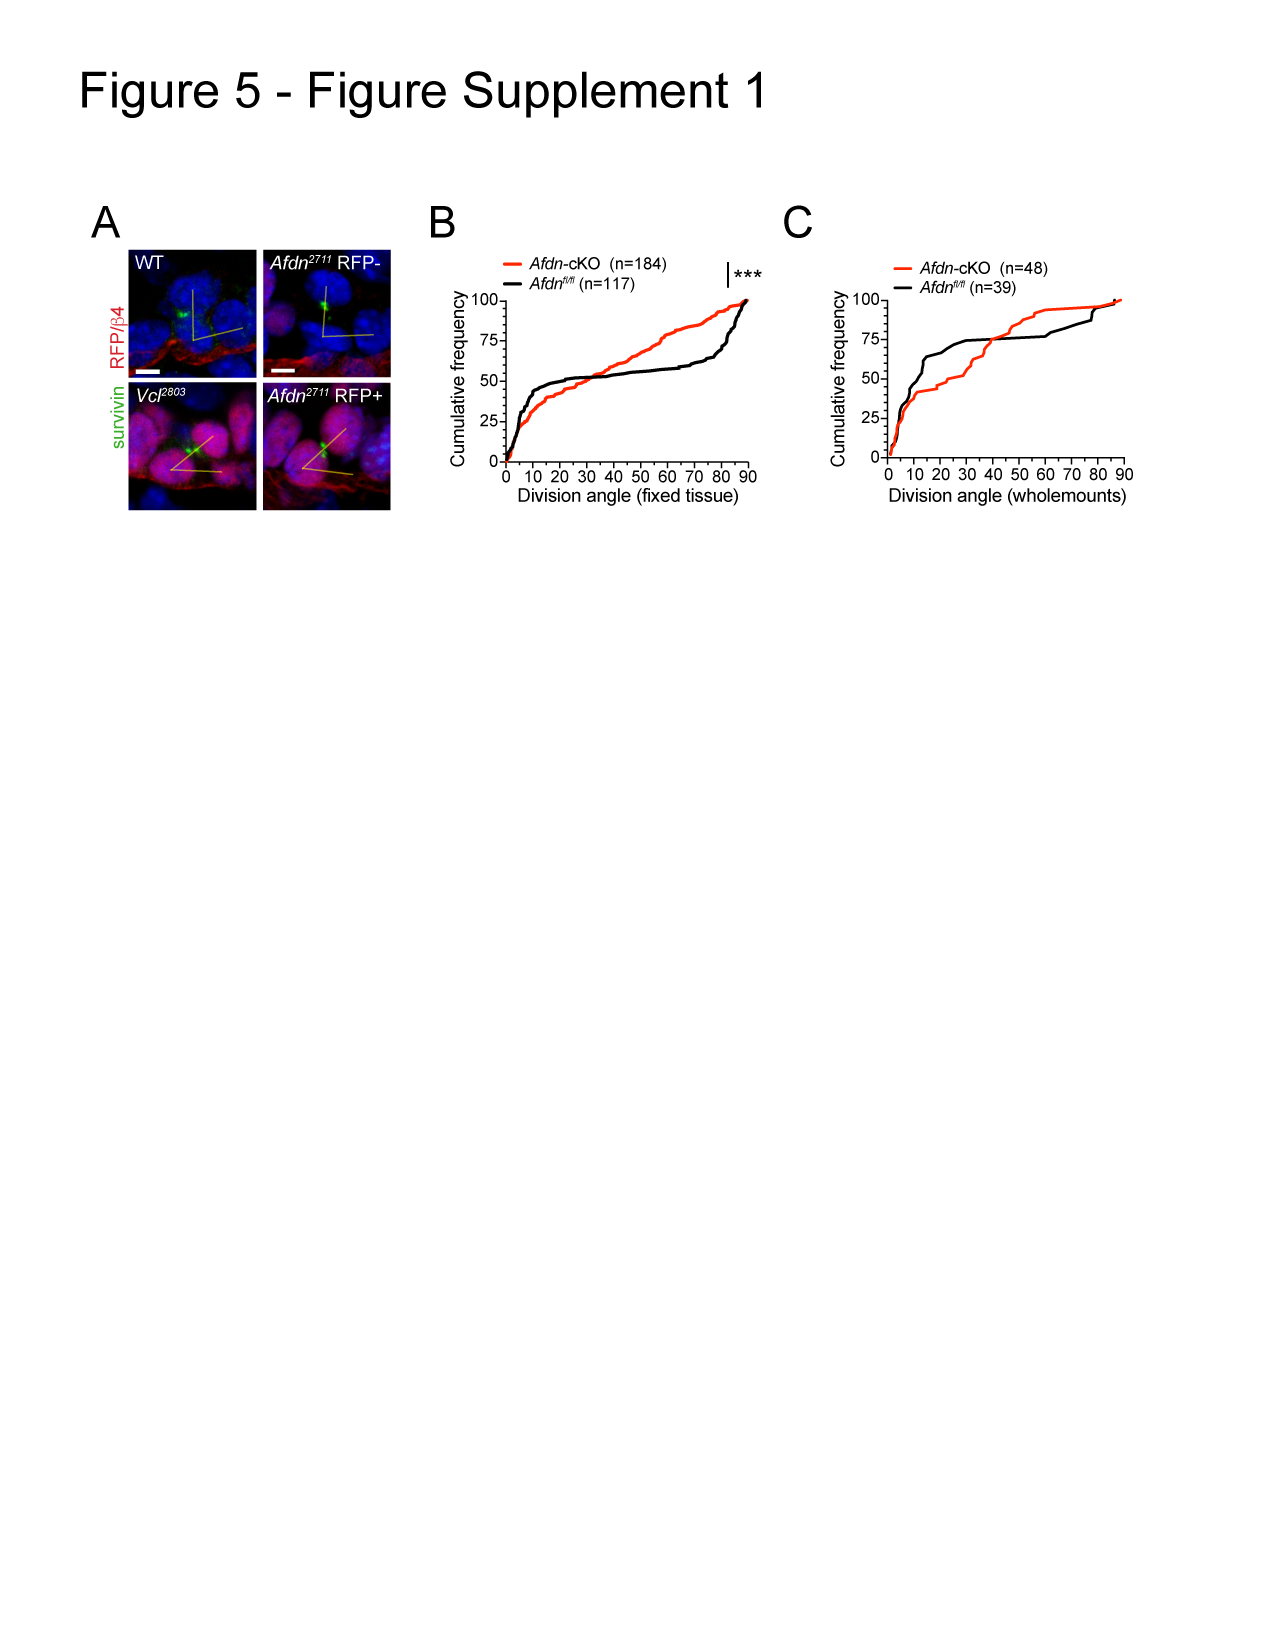

Supplement: supp [file elife-49249-supp-v1.zip › elife_poa_e49249_Figure_5_figure_supplement_1.tif]

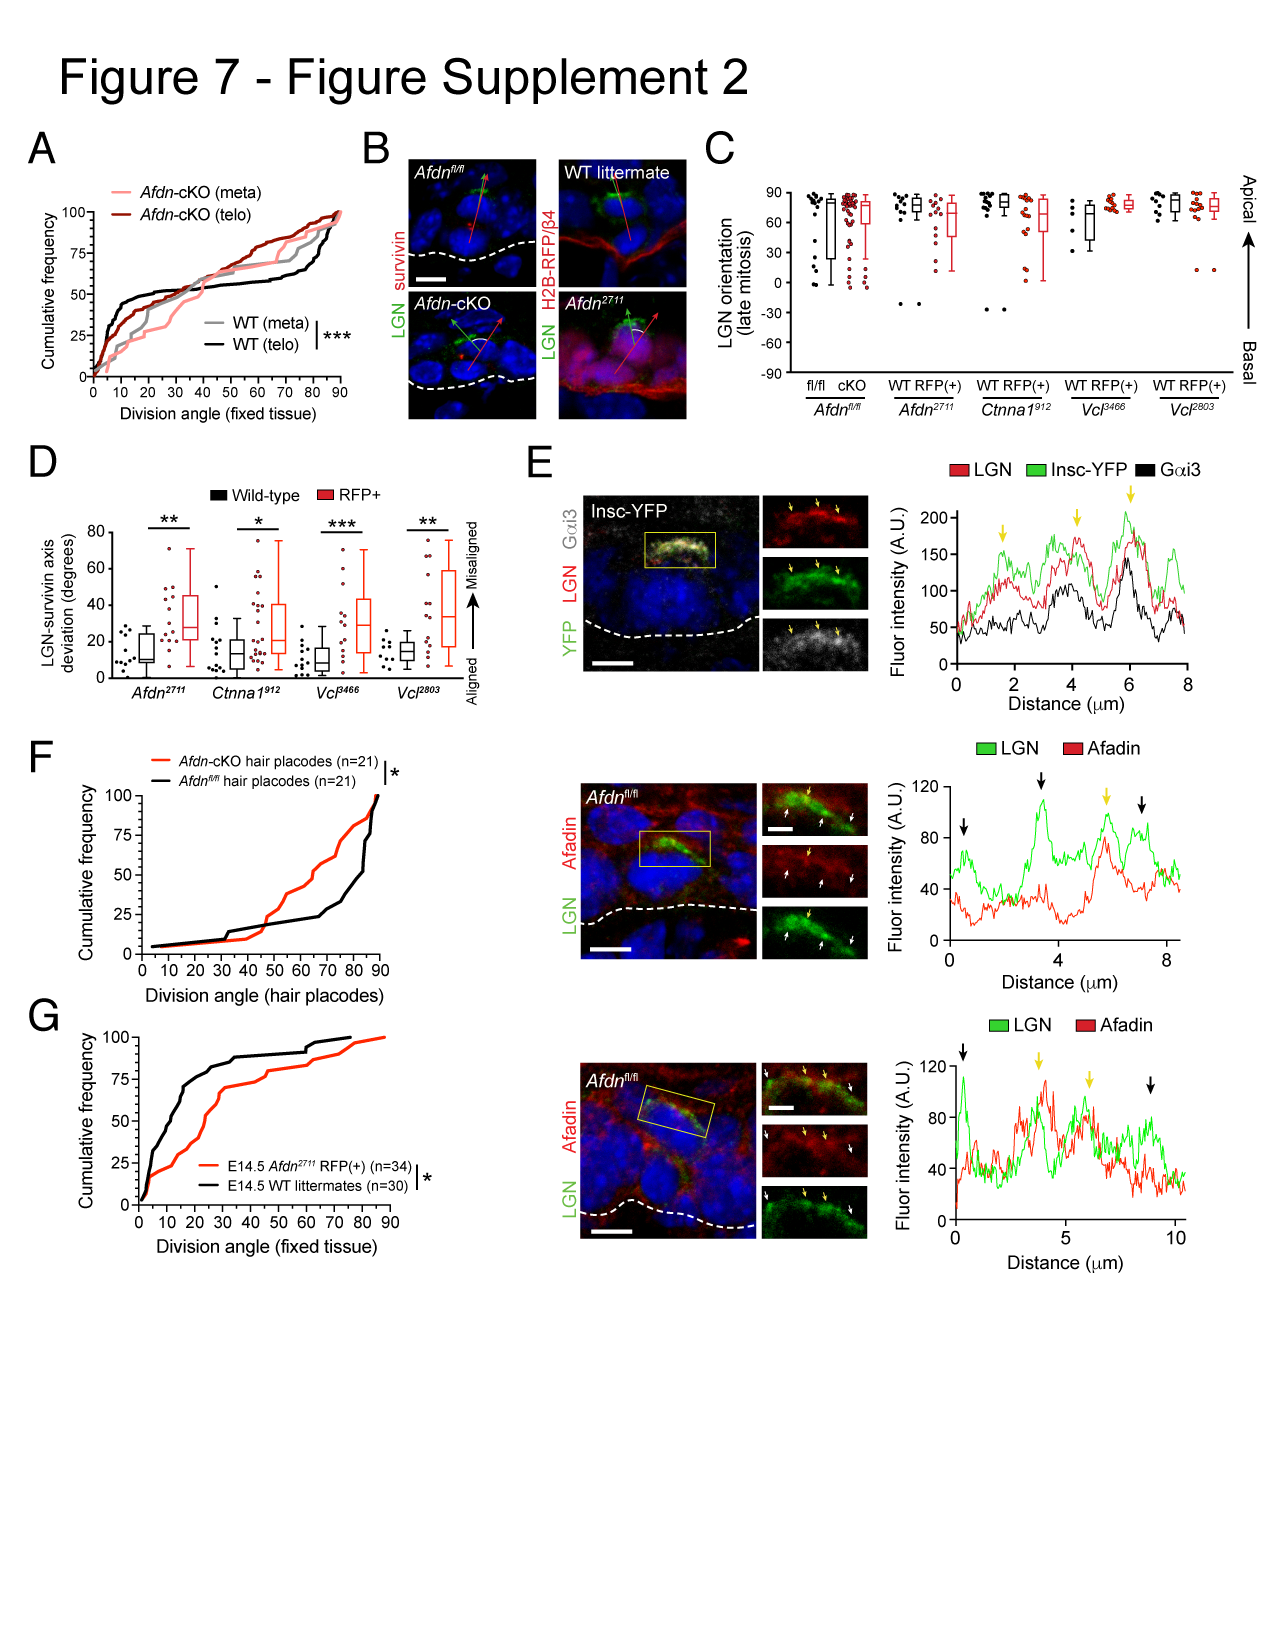

Supplement: supp [file elife-49249-supp-v1.zip › elife_poa_e49249_Figure_7_figure_supplement_2.tif]

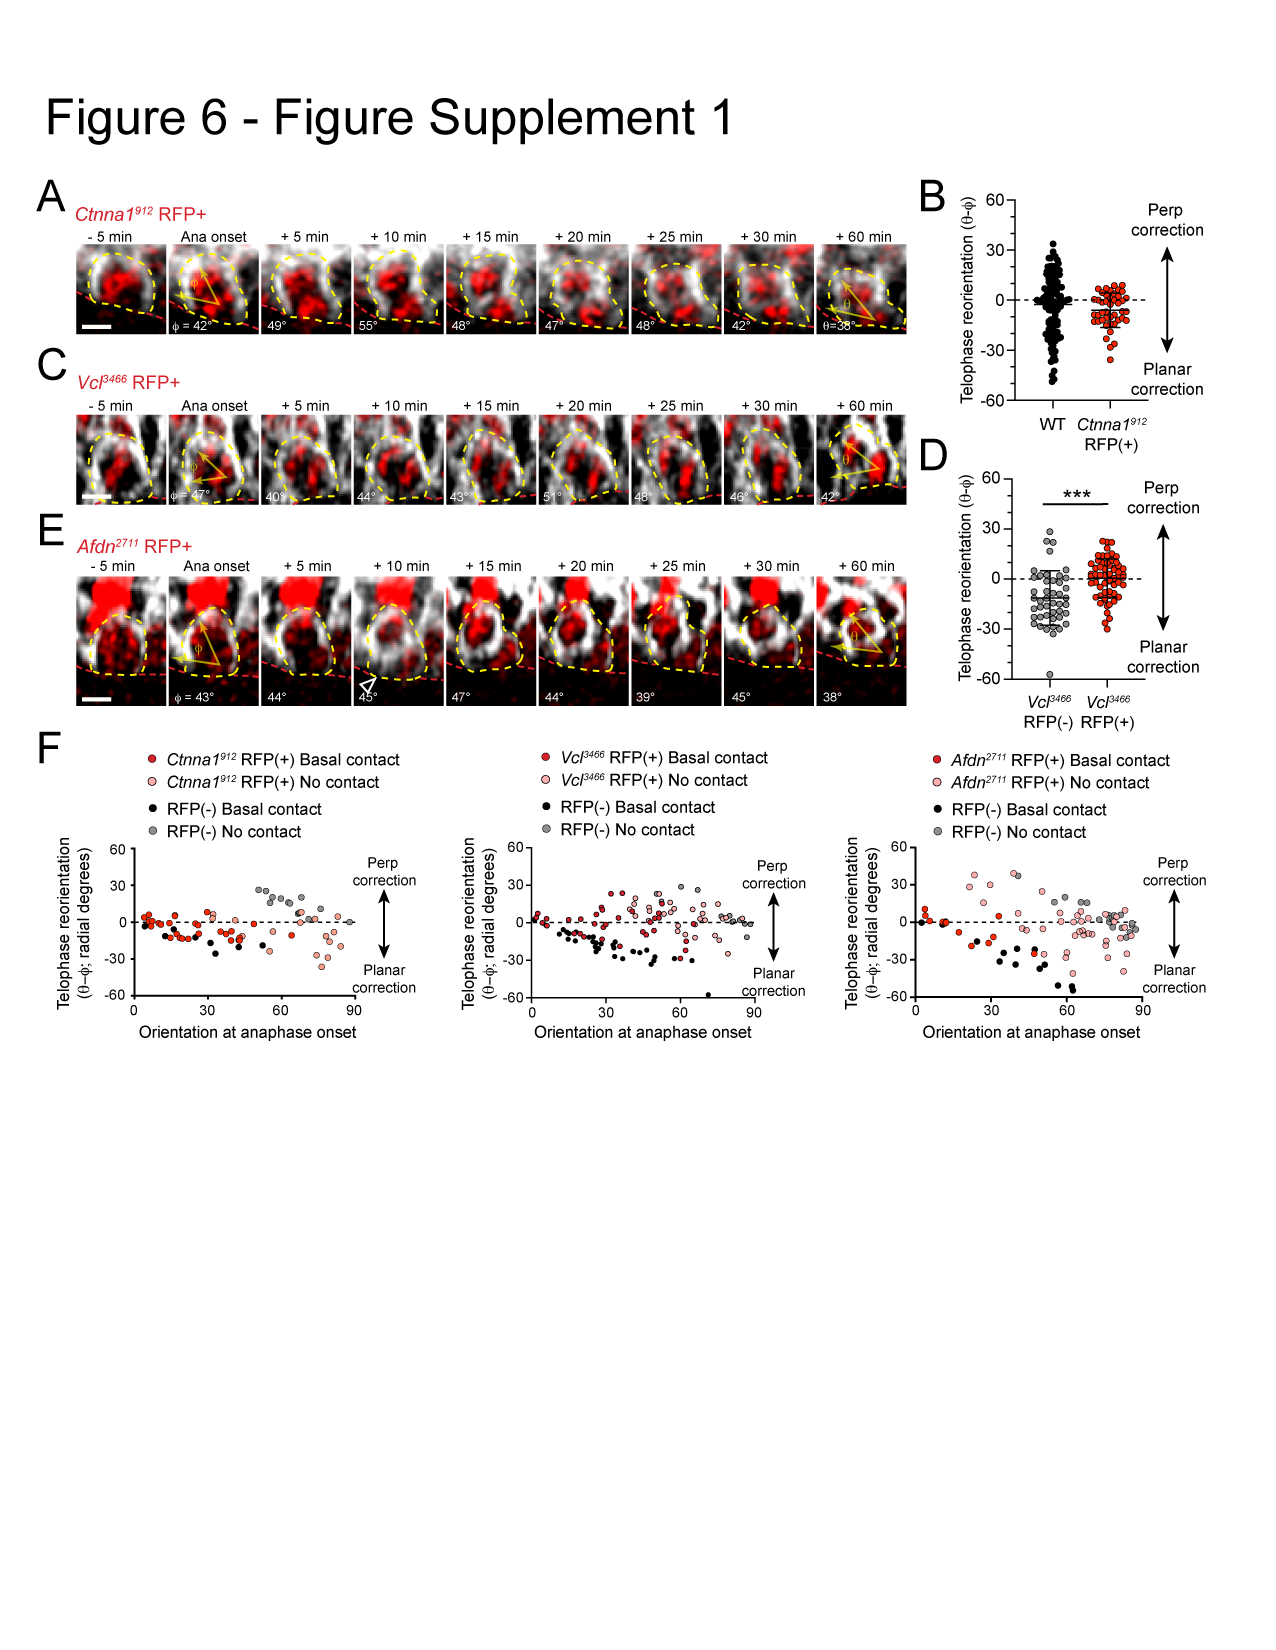

Supplement: supp [file elife-49249-supp-v1.zip › elife_poa_e49249_Figure_6_figure_supplement_1.tif]

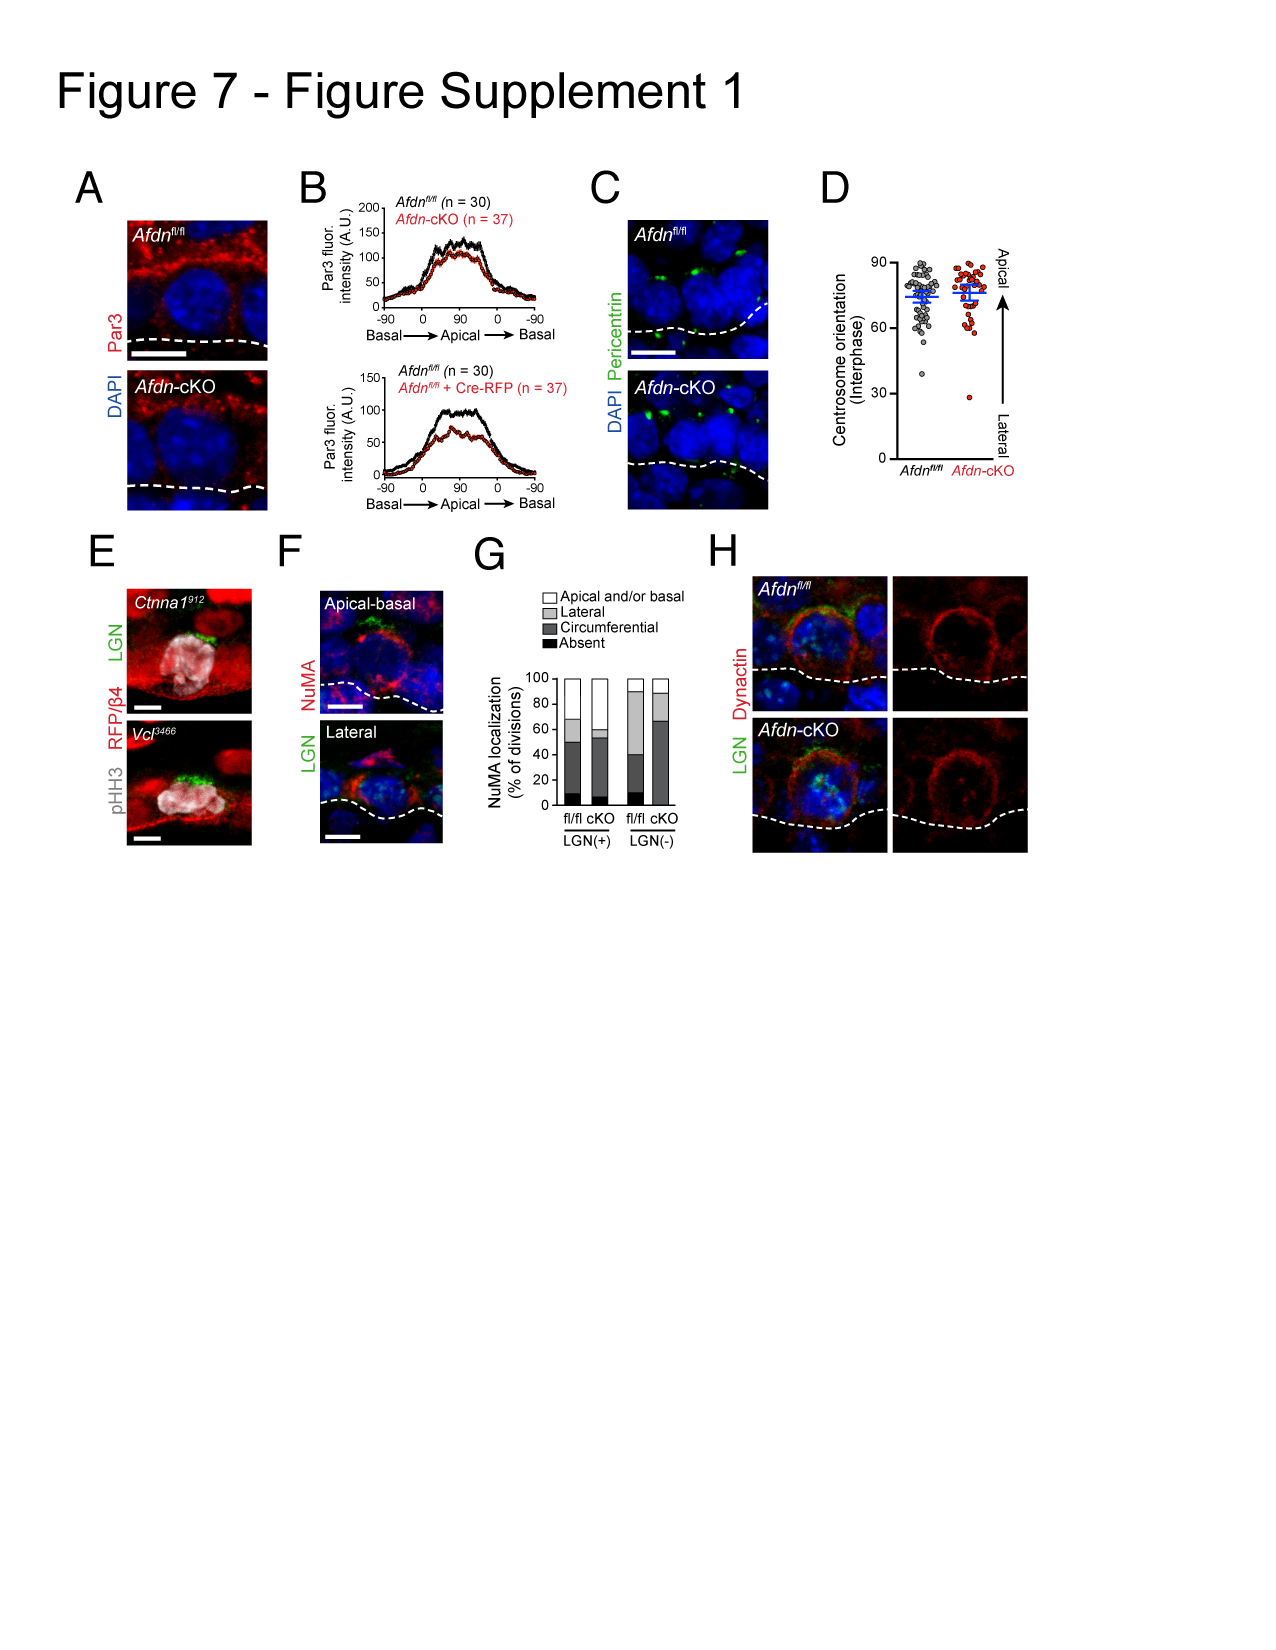

Supplement: supp [file elife-49249-supp-v1.zip › elife_poa_e49249_Figure_7_figure_supplement_1.tif]
